# Supplementary material for: Synthesis of lightly branched ultrahigh-molecular-weight polyethylene using cationic benzocyclohexyl nickel catalysts
Source: Royal Society of Chemistry journal article supplement (doi:10.1039/d2py01087a), 2022-11-25
Supplement: d2py01087a1.pdf [file d2py01087a1.pdf]

# Synthesis of Lightly Branched Ultrahigh-Molecular-Weight Polyethylene Using Cationic Benzocyclohexyl Nickel Catalysts

Zhengpeng Yan<sup>†a</sup>, Guanru Chang<sup>†a,b</sup>, Wenping Zou<sup>c</sup>, Gen Luo<sup>a\*</sup>,  
Shengyu Dai<sup>a\*</sup>

*<sup>a</sup>Institutes of Physical Science and Information Technology, Key Laboratory of Structure and Functional Regulation of Hybrid Materials of Ministry of Education, Anhui University, Hefei, Anhui, 230601, China.*

*<sup>b</sup>School of Chemistry and Chemical Engineering, Key Laboratory of Inorganic Functional Material, Huangshan University, Huangshan, Anhui 245041, China*

*<sup>c</sup>Department of Chemistry, University of Houston, 4800 Calhoun Rd, Houston, TX 77004, USA*

<sup>†</sup>The first two authors are equal first authors.

\*To whom correspondence should be addressed. luogen@ahu.edu.cn (Gen Luo);  
daiyu@ustc.edu.cn (Shengyu Dai).

## 1. Experimental sections

### 1.1 General Considerations

All chemicals were commercially sourced, except those whose synthesis is described. All experiments were carried out under a dry nitrogen atmosphere using standard Schlenk techniques or in a glove-box. Deuterated solvents used for NMR were dried and distilled prior to use. <sup>1</sup>H, <sup>13</sup>C NMR spectra were recorded by a JNM-ECZ600R or JNM-ECZ400R spectrometer at ambient temperature unless otherwise stated. The chemical shifts of the <sup>1</sup>H and <sup>13</sup>C NMR spectra were referenced to the residual solvent; Coupling constants are in Hz. Mass spectra were obtained by the Analytical Center of Anhui University. Elemental analysis was performed by the Analytical Center of Anhui University. X-ray Diffraction data were collected at 298(2) K on a Bruker Smart CCD area detector with graphite-monochromated Mo K<sup>α</sup> radiation ( $\lambda = 0.71073 \text{ \AA}$ ). Molecular weight and molecular weight distribution of the polymers were determined by gel permeation chromatography (GPC) with a PL 210 equipped

with one Shodex AT-803S and two Shodex AT-806MS columns at 150 °C using trichlorobenzene as a solvent and calibrated with polystyrene standards. Stress/strain experiments were performed at 10 mm/min by means of a Universal Test Machine (UTM2502) at room temperature. Polymers were melt-pressed at 50 °C above their melting point to obtain the test specimens. The test specimens have 14-mm gauge length, 2-mm width, and thickness of 0.5 mm. Differential scanning calorimetry (DSC) was performed by a DSC Q25 from TA Instruments. Samples were quickly heated to 150°C and kept for 5 min to remove thermal history, then cooled to -70°C at a rate of 10 K/min, and finally reheated to 150°C at the same rate under a nitrogen flow (50 mL/min). The maximum points endotherm (heating scan) were taken as the melting temperature ( $T_m$ ).

## 1.2 Procedure for the Synthesis of Ligands L1-L2.

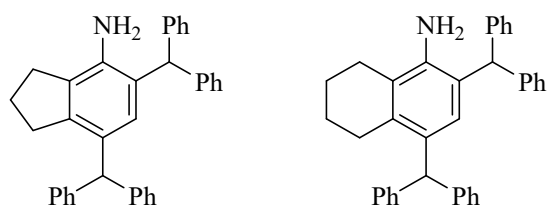

These compounds were synthesized by the reported literature.<sup>1</sup>

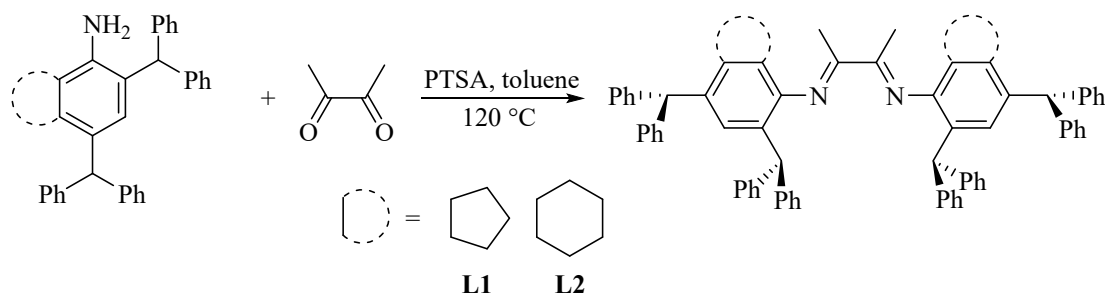

A mixture of aniline (4.2 mmol), 2,3-butanedione (0.172 g, 2 mmol), and a catalytic amount of *p*-toluenesulfonic acid in 20 mL toluene was refluxed for 72 h. The solution was evaporated at reduced pressure, and the remaining solution was diluted in ethanol (20 mL). The yellow solid was isolated by filtration, followed by recrystallization from dichloromethane and ethanol.

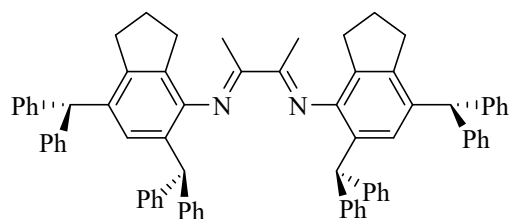

**L1** (1.33 g, 68%).  $^1\text{H}$  NMR (400 MHz,  $\text{CDCl}_3$ )  $\delta$  7.15 - 6.97 (m, 24H, Ar-*H*), 6.93 (d,  $J = 7.1$  Hz, 4H, Ar-*H*), 6.83 (dd,  $J = 16.6, 7.7$  Hz, 12H, Ar-*H*), 6.19 (s, 2H, Ar-*H*), 5.38 (s, 2H, -*CH*-), 5.19 (s, 2H, -*CH*-), 2.62 (dd,  $J = 26.9, 7.1$  Hz, 4H, - $\text{CH}_2$ -), 2.44 (dd,  $J = 16.4, 10.1$  Hz, 2H, - $\text{CH}_2$ -), 2.40-2.29 (m, 2H, - $\text{CH}_2$ -), 1.99 - 1.86 (m, 4H, - $\text{CH}_2$ -), 1.24 (s, 6H, Ar- $\text{C}(\text{CH}_3)=\text{N}$ ).  $^{13}\text{C}$  NMR (101 MHz,  $\text{CDCl}_3$ )  $\delta$  167.19 ( $\text{C}=\text{N}$ ), 142.41, 141.10, 133.34, 130.15, 129.91, 128.44, 128.29, 128.12, 127.92, 127.20, 127.07, 126.98, 126.81, 124.96, 124.87, 124.75, 53.08 (-*CH*-), 51.31 (-*CH*-), 30.60 (- $\text{CH}_2$ -), 29.68 (- $\text{CH}_2$ -), 28.68 (- $\text{CH}_2$ -), 14.64 (Ar- $\text{C}(\text{CH}_3)=\text{N}$ ). APCI-MS ( $m/z$ ): calcd for  $\text{C}_{74}\text{H}_{65}\text{N}_2$ : 981.5148, Found, 981.5129,  $[\text{M}+\text{H}]^+$ .

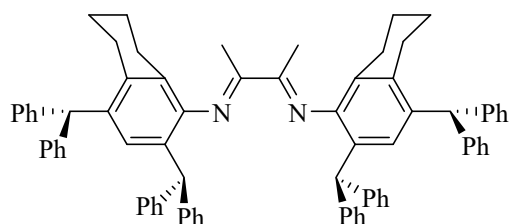

**L2** (1.21 g, 60%).  $^1\text{H}$  NMR (400 MHz,  $\text{CDCl}_3$ )  $\delta$  7.19 - 6.93 (m, 24H, Ar-*H*), 6.88 (d,  $J = 7.0$  Hz, 4H, Ar-*H*), 6.80 (t,  $J = 6.5$  Hz, 8H, Ar-*H*), 6.74 (d,  $J = 6.1$  Hz, 4H, Ar-*H*), 6.16 (s, 2H, Ar-*H*), 5.51 (s, 2H, -*CH*-), 5.09 (s, 2H, -*CH*-), 2.67 (d,  $J = 16.5$  Hz, 2H, - $\text{CH}_2$ -), 2.41 (d,  $J = 16.8$  Hz, 2H, - $\text{CH}_2$ -), 2.25 (d,  $J = 16.7$  Hz, 2H, - $\text{CH}_2$ -), 1.99 (dd,  $J = 15.2, 7.3$  Hz, 2H, - $\text{CH}_2$ -), 1.75 (d,  $J = 5.5$  Hz, 4H, - $\text{CH}_2$ -), 1.55 (s, 4H, - $\text{CH}_2$ -), 1.18 (s, 6H, Ar- $\text{C}(\text{CH}_3)=\text{N}$ ).  $^{13}\text{C}$  NMR (101 MHz,  $\text{CDCl}_3$ )  $\delta$  168.82 ( $\text{C}=\text{N}$ ), 145.69, 144.05, 143.72, 143.33, 142.79, 136.64, 133.94, 129.53, 129.47, 129.26, 129.07, 128.53, 128.24, 128.08, 128.01, 127.80, 126.07, 125.93, 125.85, 125.73, 123.82, 52.59 (-*CH*-), 52.28 (-*CH*-), 26.59 (- $\text{CH}_2$ -), 26.13 (- $\text{CH}_2$ -), 23.03 (- $\text{CH}_2$ -), 22.57 (- $\text{CH}_2$ -), 15.94 (Ar- $\text{C}(\text{CH}_3)=\text{N}$ ). APCI-MS ( $m/z$ ): calcd for  $\text{C}_{76}\text{H}_{69}\text{N}_2$ : 1009.5461, Found, 1009.5456,  $[\text{M}+\text{H}]^+$ .

### 1.3 Procedure for the Synthesis of Ligands L3-L4.

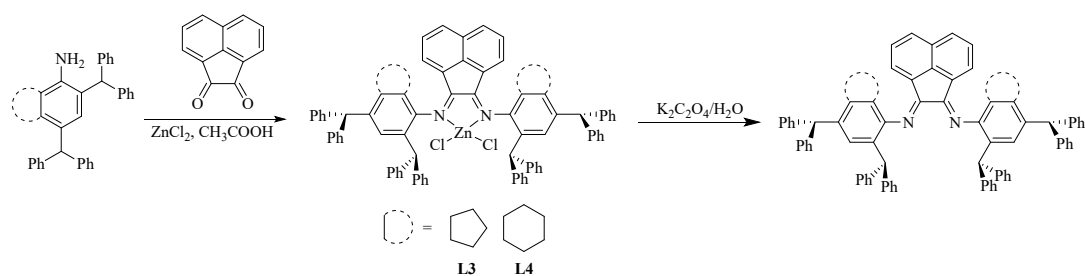

T

The ligands **L3-L4** were prepared as follows:  $\text{ZnCl}_2$  (0.34 g, 2.5 mmol) and acenaphthoquinone (2.0 mmol), were suspended in glacial acetic acid (5 mL). Anilines (4.2 mmol) was added, and the reaction mixture was refluxed under stirring for 4 h. The solution was allowed to cool to room temperature, and a bright yellow solid precipitated. The solid was separated by filtration and washed with acetic acid ( $3 \times 5$  mL) and diethyl ether ( $5 \times 5$  mL), to remove remaining acetic acid. Drying under vacuum gave bright yellow, poorly soluble solid. Then the zinc was removed from the zinc diimine complex. The product of the previous step was suspended in methylene chloride (30 mL), and a solution of potassium oxalate (0.41 g, 2.2 mmol) in water (5 mL) was added. The reaction mixture was stirred vigorously for 1 h. The two phases were separated, and the organic layer was washed with water ( $3 \times 20$  mL) and dried with  $\text{MgSO}_4$ . After filtration, the solvent was removed under vacuum to afford the product as a yellow powder.

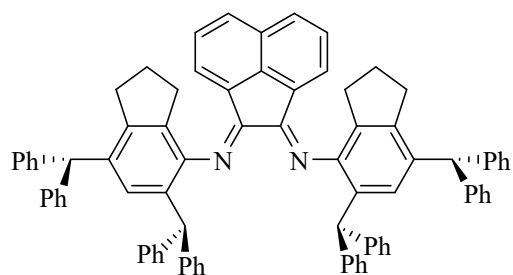

**L3** (1.53 g, 71%).  $^1\text{H NMR}$  (400 MHz,  $\text{CDCl}_3$ )  $\delta$  7.61 (d,  $J = 8.2$  Hz, 2H, Ar-*H*), 7.35 - 7.22 (m, 8H, Ar-*H*), 7.21 - 7.11 (m, 10H, Ar-*H*), 7.10 - 6.98 (m, 12H, Ar-*H*), 6.92 (d,  $J = 7.3$  Hz, 4H, Ar-*H*), 6.83 (d,  $J = 7.5$  Hz, 4H, Ar-*H*), 6.37 (dd,  $J = 15.8, 8.2$  Hz, 4H, Ar-*H*), 6.25 (d,  $J = 7.1$  Hz, 2H, Ar-*H*), 6.11 (t,  $J = 7.3$  Hz, 2H, Ar-*H*), 5.69 (d,  $J = 6.7$  Hz, 2H, -*CH*-), 5.57 (d,  $J = 11.2$  Hz, 2H, -*CH*-), 3.05 - 2.93 (m, 2H, -*CH*<sub>2</sub>-), 2.87 -

2.75 (m, 2H,  $-CH_2-$ ), 2.73 - 2.63 (m, 2H,  $-CH_2-$ ), 2.63 - 2.51 (m, 2H,  $-CH_2-$ ), 2.10 - 1.86 (m, 4H,  $-CH_2-$ ).  $^{13}C$  NMR (101 MHz,  $CDCl_3$ )  $\delta$  162.19 (C=N), 144.83, 143.81, 143.31, 143.23, 142.15, 142.06, 139.89, 135.09, 131.58, 129.74, 129.41, 129.20, 129.11, 129.06, 128.17, 128.06, 127.70, 127.13, 126.85, 126.08, 125.99, 125.65, 124.70, 122.34, 54.20 ( $-CH-$ ), 52.32 ( $-CH-$ ), 31.71 ( $-CH_2-$ ), 30.31 ( $-CH_2-$ ), 24.73 ( $-CH_2-$ ). APCI-MS (m/z): calcd for  $C_{82}H_{65}N_2$ : 1077.5148, Found, 1077.5150,  $[M+H]^+$ .

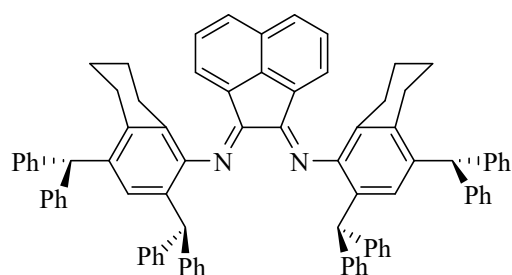

**L4** (1.70 g, 77%).  $^1H$  NMR (400 MHz,  $CDCl_3$ )  $\delta$  7.60 (d,  $J = 8.2$  Hz, 2H, Ar- $H$ ), 7.32 - 7.19 (m, 8H, Ar- $H$ ), 7.16 - 7.05 (m, 12H, Ar- $H$ ), 7.01 (d,  $J = 5.6$  Hz, 6H, Ar- $H$ ), 6.92 (d,  $J = 7.3$  Hz, 4H, Ar- $H$ ), 6.86 - 6.80 (m, 4H, Ar- $H$ ), 6.74 (d,  $J = 7.6$  Hz, 4H, Ar- $H$ ), 6.29 (dd,  $J = 14.6, 6.8$  Hz, 6H, Ar- $H$ ), 6.08 (t,  $J = 7.2$  Hz, 2H, Ar- $H$ ), 5.69 (s, 2H,  $-CH-$ ), 5.58 (s, 2H,  $-CH-$ ), 2.98 - 2.84 (m, 2H,  $-CH_2-$ ), 2.70 (t,  $J = 5.9$  Hz, 4H,  $-CH_2-$ ), 2.50 - 2.33 (m, 2H,  $-CH_2-$ ), 1.86 - 1.77 (m, 2H,  $-CH_2-$ ), 1.74 - 1.63 (m, 4H,  $-CH_2-$ ), 1.61 - 1.53 (m, 2H,  $-CH_2-$ ).  $^{13}C$  NMR (101 MHz,  $CDCl_3$ )  $\delta$  162.84 (C=N), 147.05, 144.23, 143.71, 143.34, 141.76, 139.73, 137.31, 133.80, 129.73, 129.47, 129.34, 129.14, 129.09, 128.16, 128.01, 127.67, 126.98, 126.82, 126.06, 125.90, 125.61, 124.85, 124.70, 122.24, 52.62 ( $-CH-$ ), 52.25 ( $-CH-$ ), 26.65 ( $-CH_2-$ ), 25.88 ( $-CH_2-$ ), 23.07 ( $-CH_2-$ ), 22.57 ( $-CH_2-$ ). APCI-MS (m/z): calcd for  $C_{84}H_{69}N_2$ : 1105.5461, Found, 1105.5443,  $[M+H]^+$ .

#### 1.4 Procedure for the Synthesis of Nickel Complexes Ni1-Ni4.

Complexes **Ni1-Ni4** were synthesized by the reaction of 1 equiv. of  $(DME)NiBr_2$  with the corresponding ligands in methylene chloride. The ligand (0.2 mmol) was added in 5 mL of methylene chloride in a Schlenk tube under a nitrogen atmosphere.  $(DME)NiBr_2$  (0.2 mmol, 62 mg) was added to the above solution. The resulting

mixture was stirred at room temperature overnight. The solvent was evaporated under reduced pressure to afford a solid. The product was washed with  $4 \times 5$  mL diethyl ether and dried under vacuum.

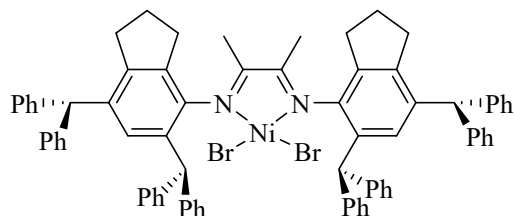

**Ni1** (187 mg, 78%). Elem. Anal. Calcd for  $C_{74}H_{64}Br_2N_2Ni$ : C, 74.08; H, 5.38; N, 2.33.  
Found: C, 73.99; H, 5.47; N, 2.31.

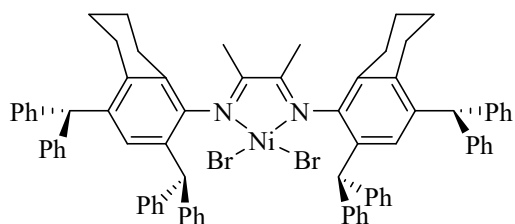

**Ni2** (184 mg, 75%). Elem. Anal. Calcd for  $C_{76}H_{68}Br_2N_2Ni$ : C, 74.34; H, 5.58; N, 2.28.  
Found: C, 74.28; H, 5.64; N, 2.21.

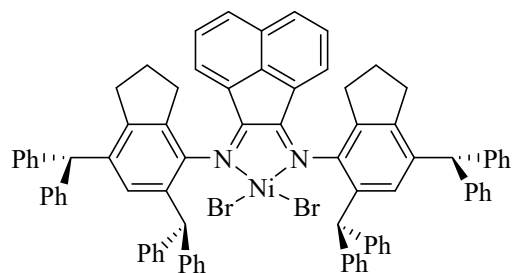

**Ni3** (223 mg, 86%). Elem. Anal. Calcd for  $C_{82}H_{64}Br_2N_2Ni$ : C, 76.00; H, 4.98; N, 2.16.  
Found: C, 75.89; H, 4.87; N, 2.08.

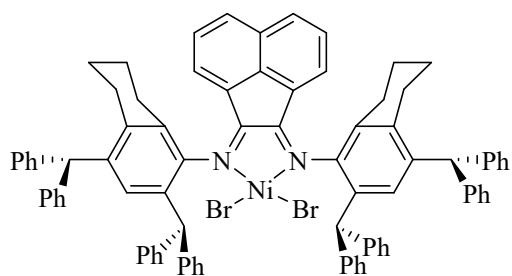

**Ni4** (233 mg, 88%). Elem. Anal. Calcd for  $C_{84}H_{68}Br_2N_2Ni$ : C, 76.20; H, 5.18; N, 2.12. Found: C, 76.23; H, 5.26; N, 2.20.

### 1.5 A general procedure for the homopolymerization of ethylene using Ni(II) complexes.

In a typical experiment, a 350 mL stainless pressure reactor connected with a high pressure gas line was firstly dried at 90 °C under vacuum for at least 1 h. The reactor was then adjusted to the desired polymerization temperature. 20 mL of toluene and the desired amount  $Et_2AlCl$  was added to the reactor under  $N_2$  atmosphere, then the 1  $\mu$ mol Ni(II) catalyst in 1 mL of  $CH_2Cl_2$  was injected into the polymerization system via syringe. With a rapid stirring, the reactor was pressurized and maintained at 6 atm of ethylene. After 10 min, the pressure reactor was vented and the polymer was precipitated in ethanol, filtered and dried at 50 °C for at least 24 h under vacuum.

### 1.6 A general procedure for the copolymerization of MU with ethylene using Ni(II) complexes.

In a typical experiment, a 350 mL stainless pressure reactor connected with a high pressure gas line was firstly dried at 90 °C under vacuum for at least 1 h. The reactor was then adjusted to the desired polymerization temperature. 18 mL of toluene and the desired amount MU and  $Et_2AlCl$  was added to the reactor under  $N_2$  atmosphere, then 5  $\mu$ mol Ni(II) catalyst in 1 mL of  $CH_2Cl_2$  was injected into the polymerization system via syringe. With a rapid stirring, the reactor was pressurized and maintained at desired pressure of ethylene. After 10 min, the pressure reactor was

vented and the copolymer was precipitated in ethanol, filtered and dried at 50 °C for at least 24 h under vacuum.

**1.7, Table S1. Mechanical properties.<sup>a</sup>**

| Ent. | Precat. | <i>T</i> /°C | Strain (%) <sup>b</sup> | Stress (MPa) <sup>b</sup> |
|------|---------|--------------|-------------------------|---------------------------|
| 1    | Ni1     | 30           | 338                     | 16.4                      |
| 2    | Ni1     | 50           | 712                     | 30.5                      |
| 3    | Ni1     | 70           | 752                     | 29.0                      |
| 4    | Ni2     | 30           | 353                     | 20.4                      |
| 5    | Ni2     | 50           | 514                     | 28.2                      |
| 6    | Ni2     | 70           | 555                     | 20.9                      |
| 7    | Ni3     | 30           | 706                     | 24.3                      |
| 8    | Ni3     | 50           | 771                     | 21.9                      |
| 9    | Ni3     | 70           | 998                     | 30.4                      |
| 10   | Ni4     | 30           | 347                     | 14.9                      |
| 11   | Ni4     | 50           | 479                     | 19.5                      |
| 12   | Ni4     | 70           | 552                     | 17.7                      |

<sup>a</sup>Conditions: performed at 10 mm/min by means of a Universal Test Machine (UTM2502) at room temperature (25 °C). <sup>b</sup>Strain and stress at break values.

## 2. Spectra Data

### 2.1 <sup>1</sup>H and <sup>13</sup>C NMR of the Synthetic Compounds.



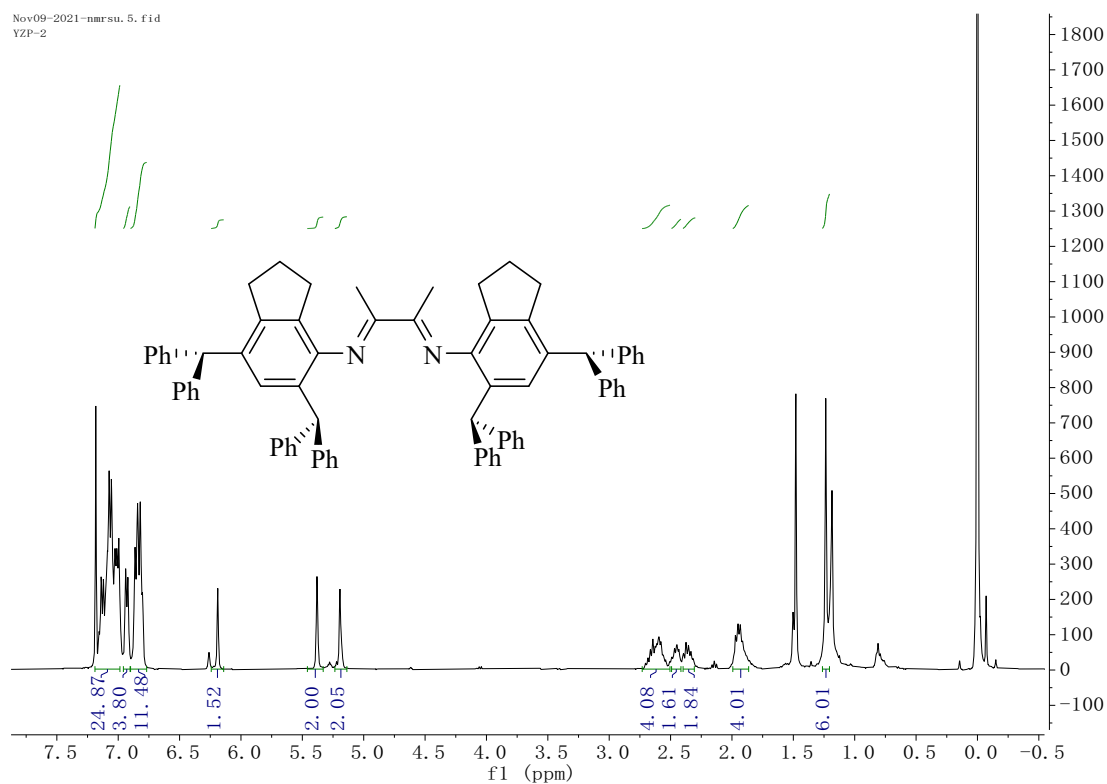

**Figure S1.**  $^1\text{H}$  NMR spectrum of L1 in  $\text{CDCl}_3$ .

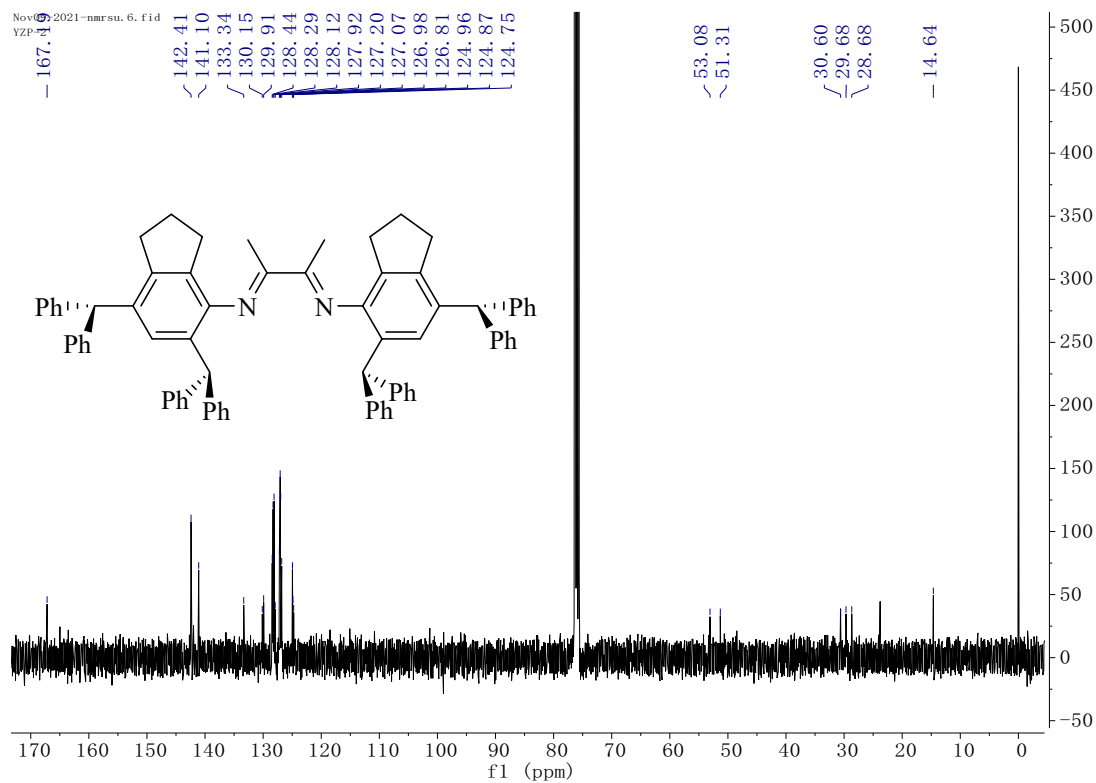

**Figure S2.**  $^{13}\text{C}$  NMR spectrum of L1 in  $\text{CDCl}_3$ .

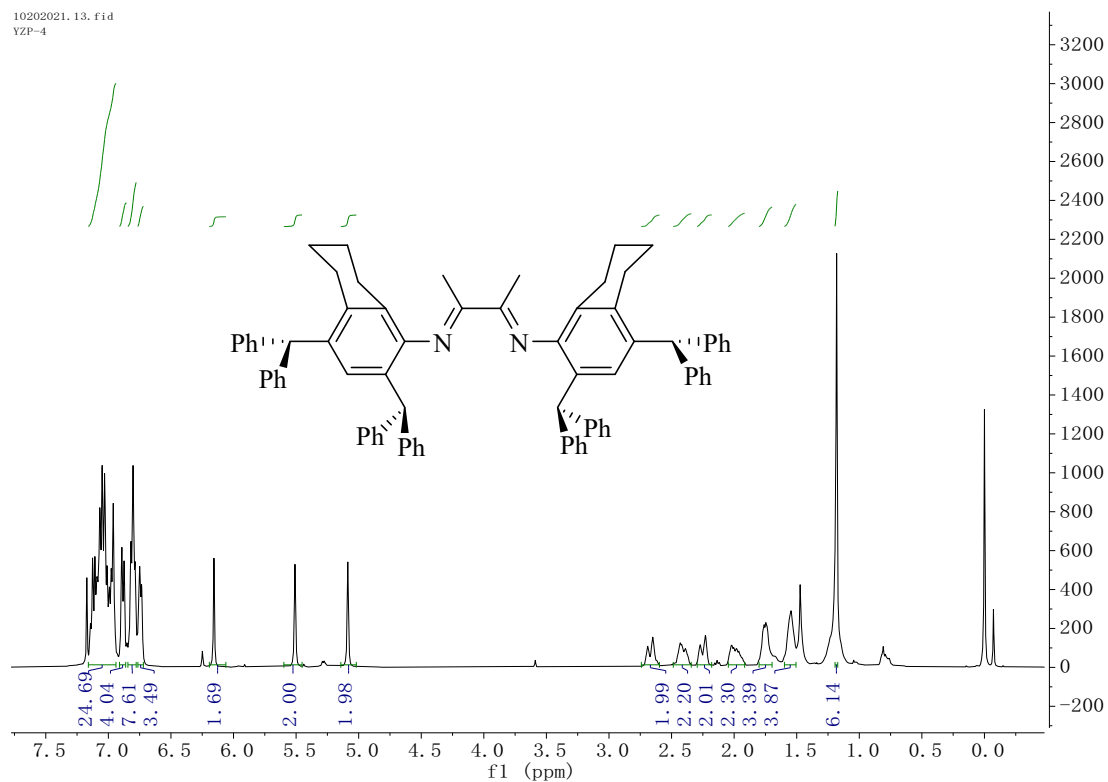

Figure S3. <sup>1</sup>H NMR spectrum of L2 in CDCl<sub>3</sub>.

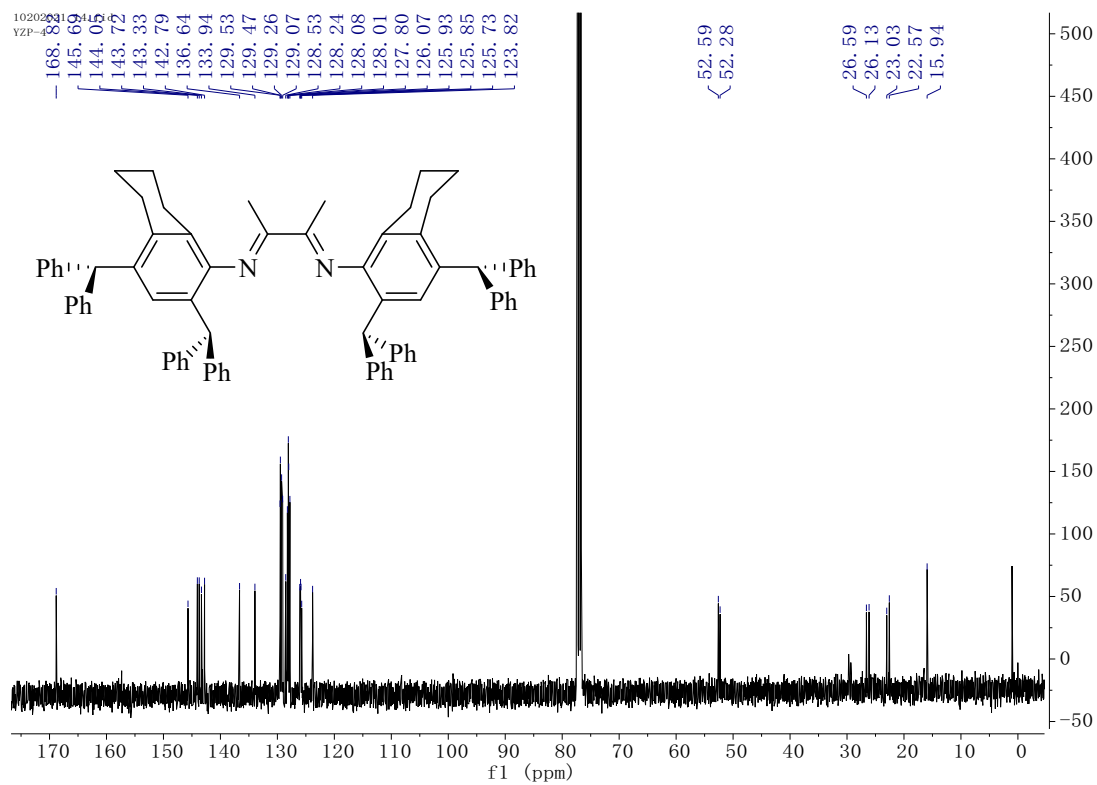

Figure S4. <sup>13</sup>C NMR spectrum of L2 in CDCl<sub>3</sub>.

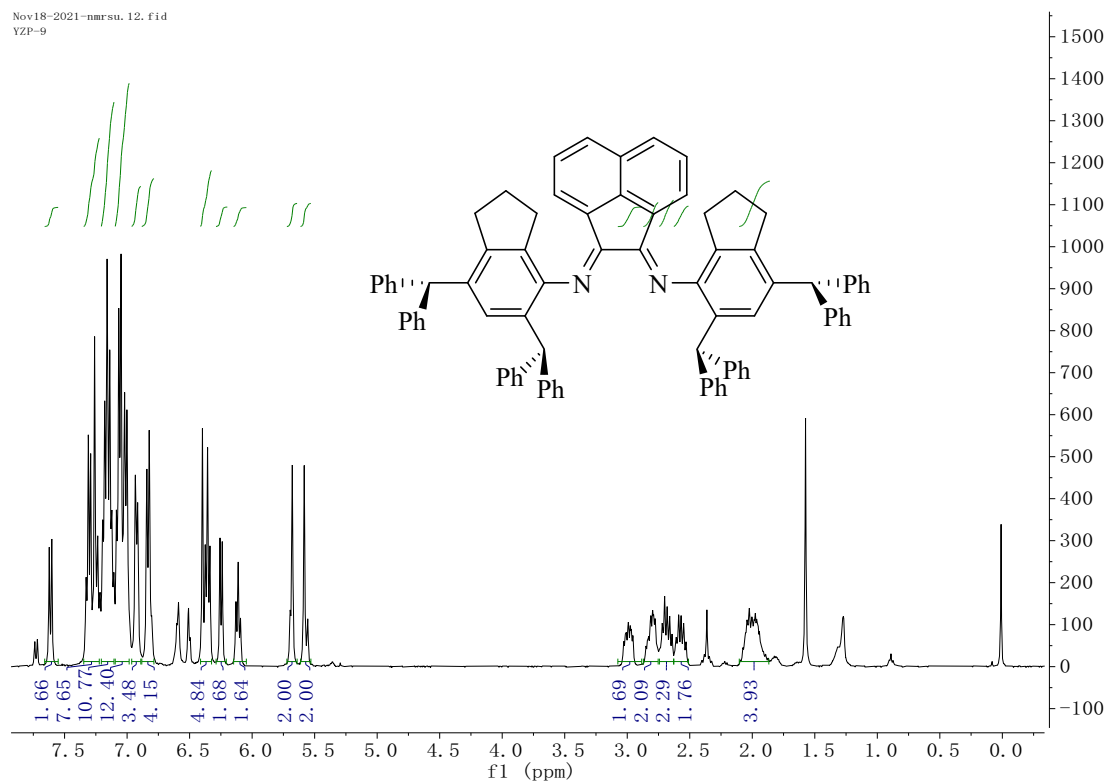

**Figure S5.**  $^1\text{H}$  NMR spectrum of L3 in  $\text{CDCl}_3$ .

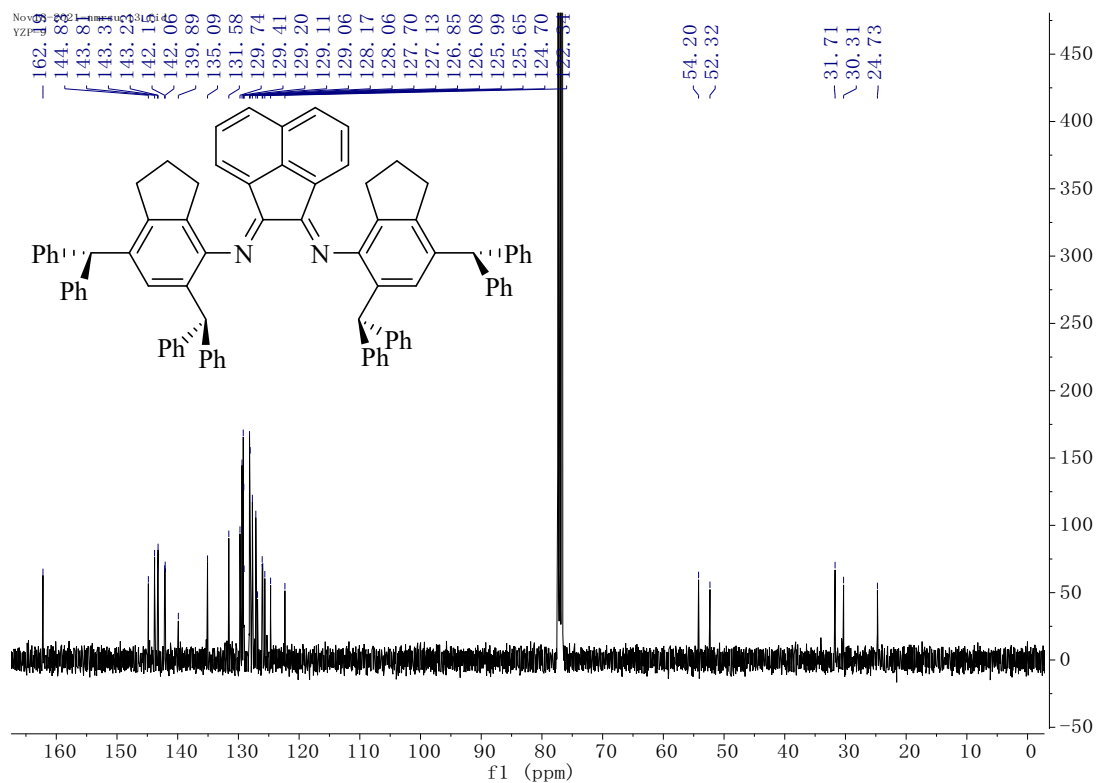

**Figure S6.**  $^{13}\text{C}$  NMR spectrum of L3 in  $\text{CDCl}_3$ .

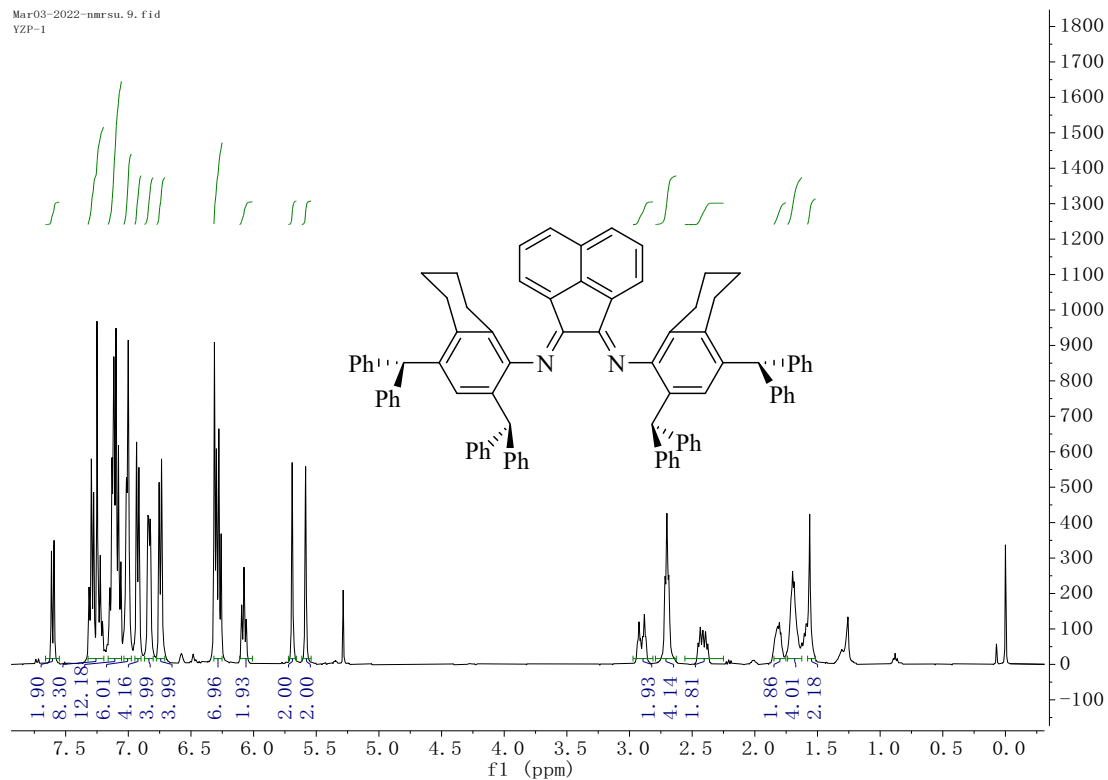

**Figure S7.**  $^1\text{H}$  NMR spectrum of L4 in  $\text{CDCl}_3$ .

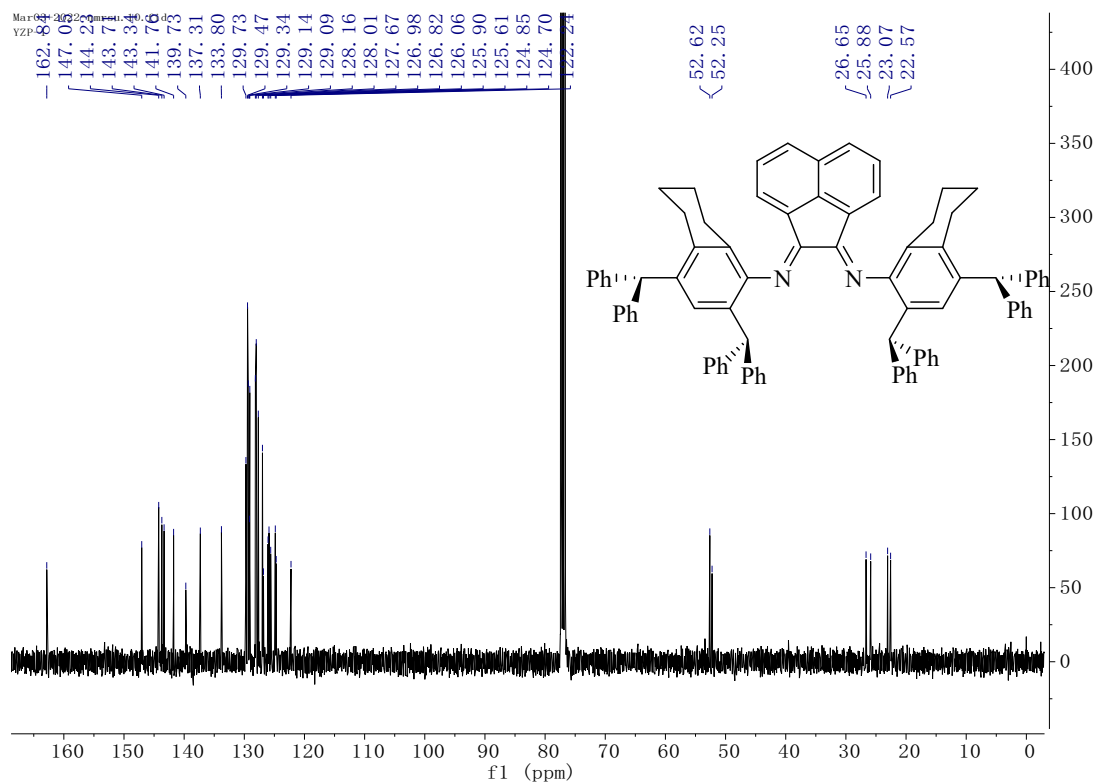

**Figure S8.**  $^{13}\text{C}$  NMR spectrum of L4 in  $\text{CDCl}_3$ .

## 2.2 MS of Ligands L1-L4.

YZP-3 #18 RT: 0.15 AV: 1 SB: 1 0.09 NL: 3.46E7  
T: FTMS + c APCI corona Full ms [150.00-1250.00]

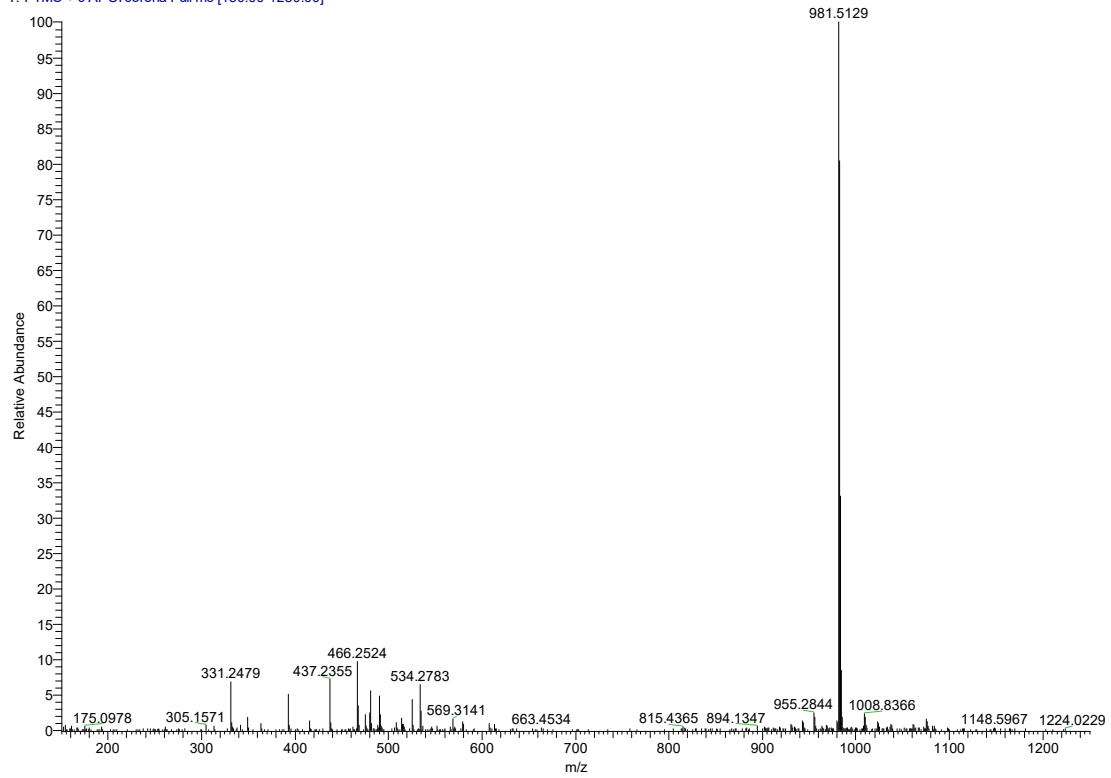

Figure S9. APCI-MS of L1.

YZP-4 #21 RT: 0.17 AV: 1 SB: 1 0.10 NL: 2.78E7  
T: FTMS + c APCI corona Full ms [150.00-1250.00]

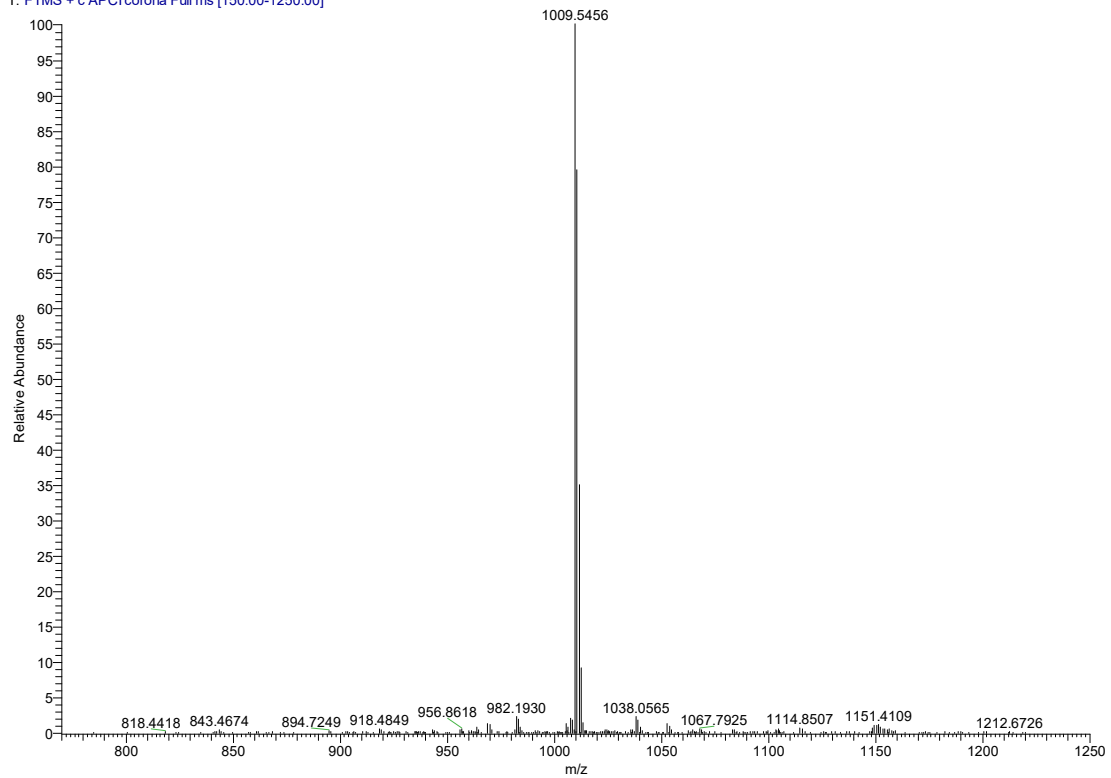

Figure S10. APCI-MS of L2.

YZP-5 #20 RT: 0.15 AV: 1 SB: 2 0.06, 0.66 NL: 2.83E7  
T: FTMS + c APCI corona Full ms [150.00-1250.00]

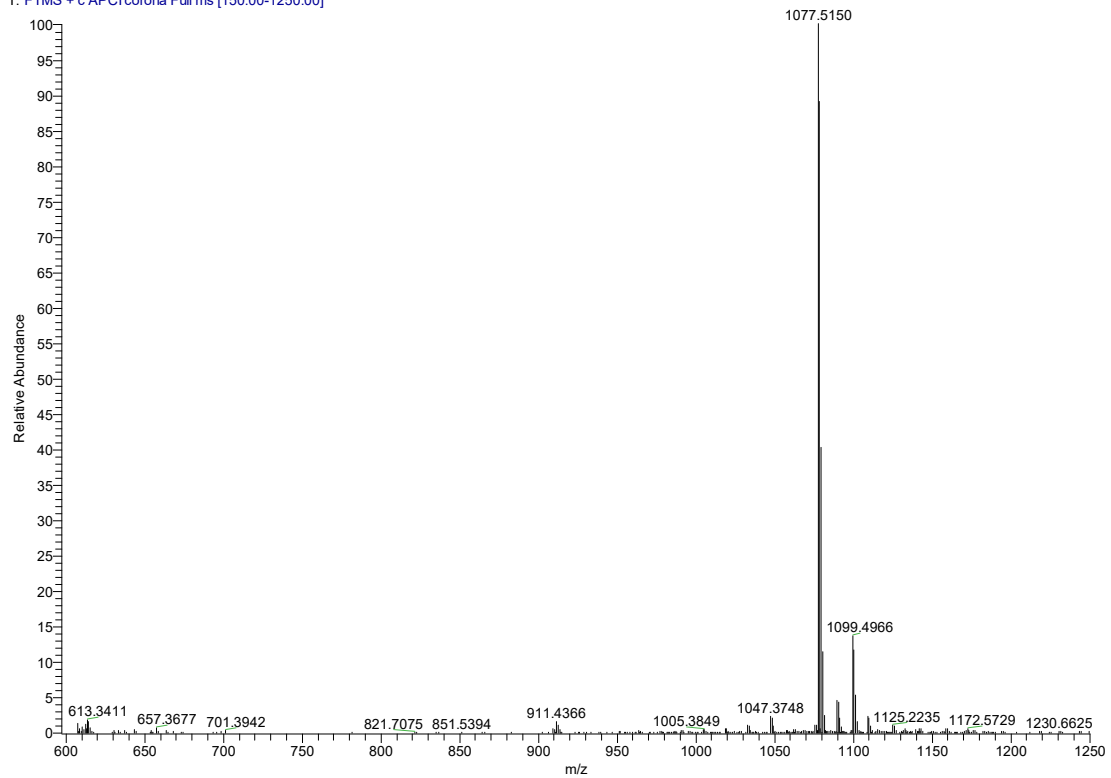

**Figure S11.** APCI-MS of L3.

YZP-6 #13 RT: 0.11 AV: 1 SB: 1 0.07 NL: 9.11E7  
T: FTMS + c APCI corona Full ms [150.00-1250.00]

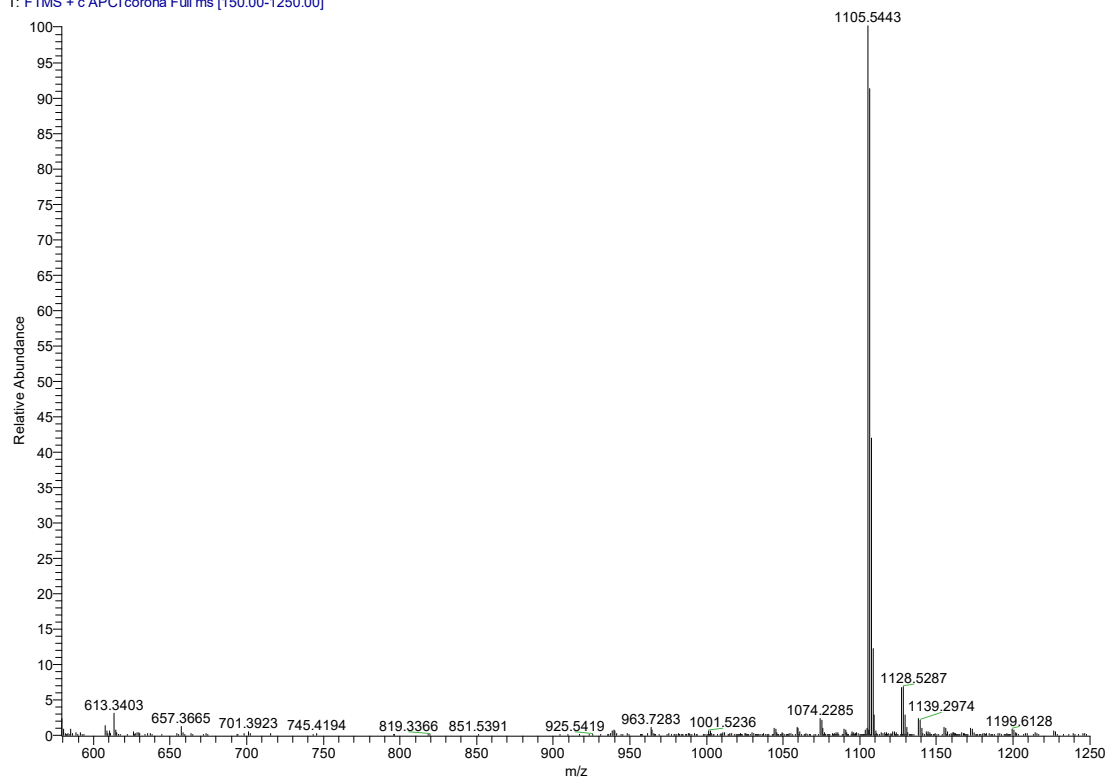

**Figure S12.** APCI-MS of L4.

### 2.3 $^1\text{H}$ and $^{13}\text{C}$ NMR of Representative Polymers and Copolymers.

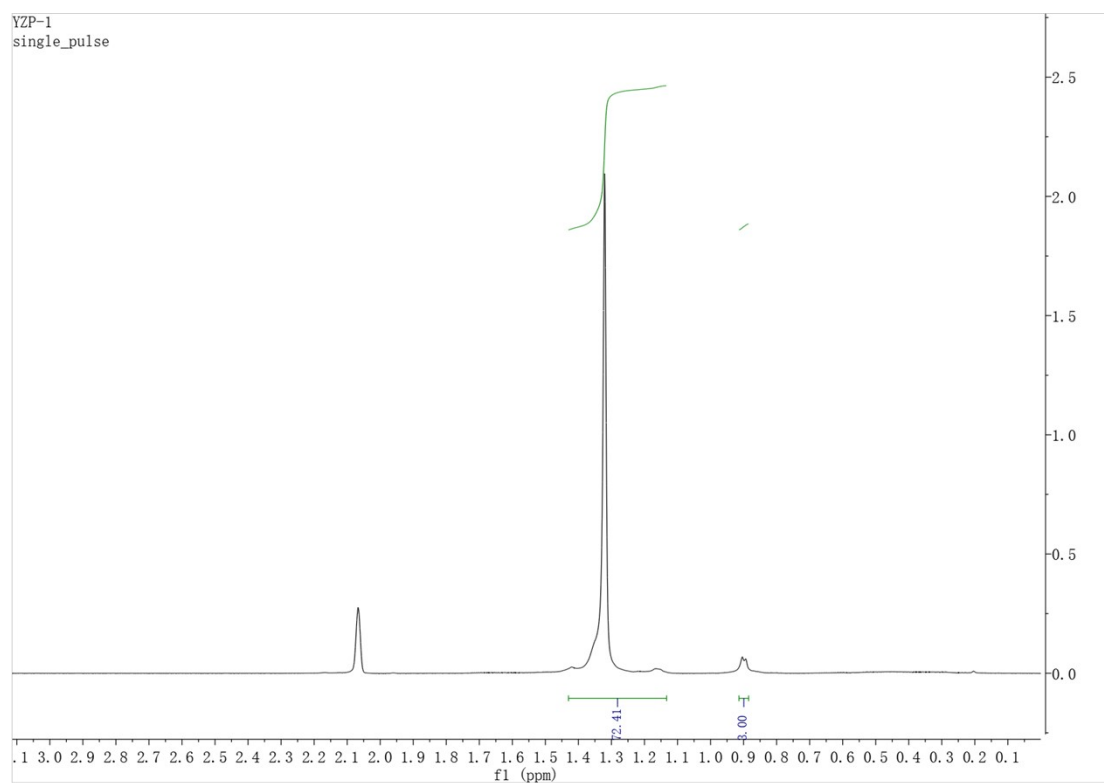

**Figure S13.**  $^1\text{H}$  NMR spectrum of the polymer from table 1, entry 1 ( $\text{d}^8$ -toluene, 100  $^\circ\text{C}$ ).

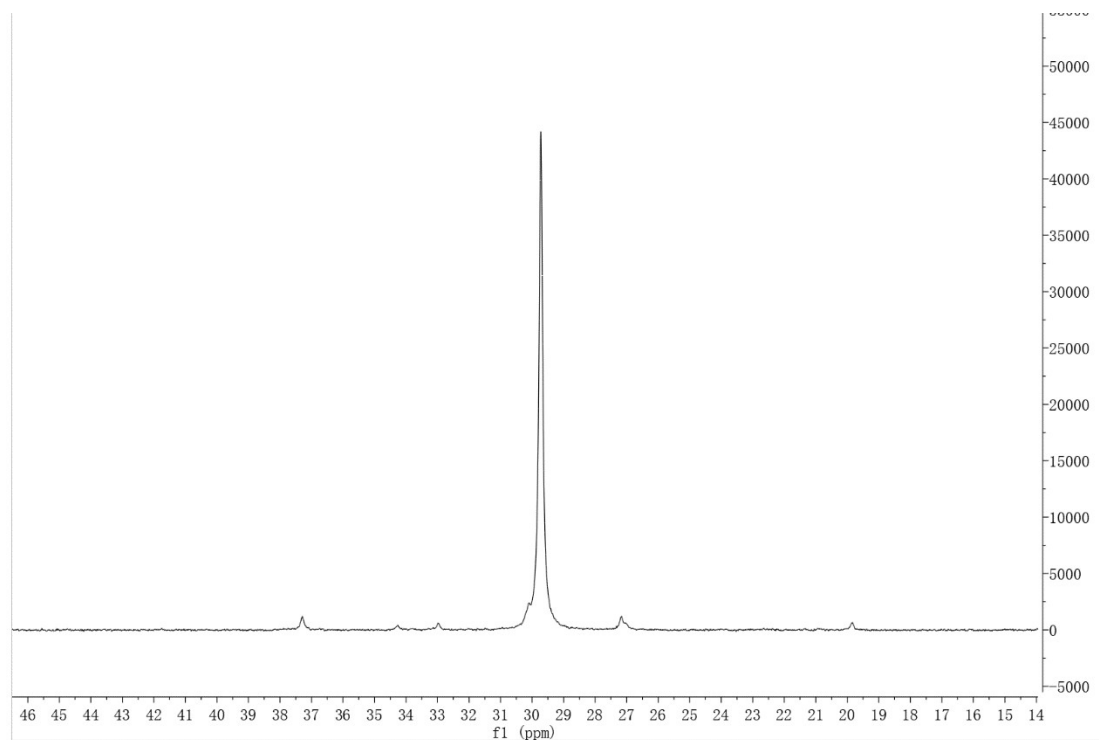

**Figure S14.**  $^{13}\text{C}$  NMR spectrum of the polymer from table 1, entry 1 ( $\text{CDCl}_2\text{CDCl}_2$ , 120  $^\circ\text{C}$ ).

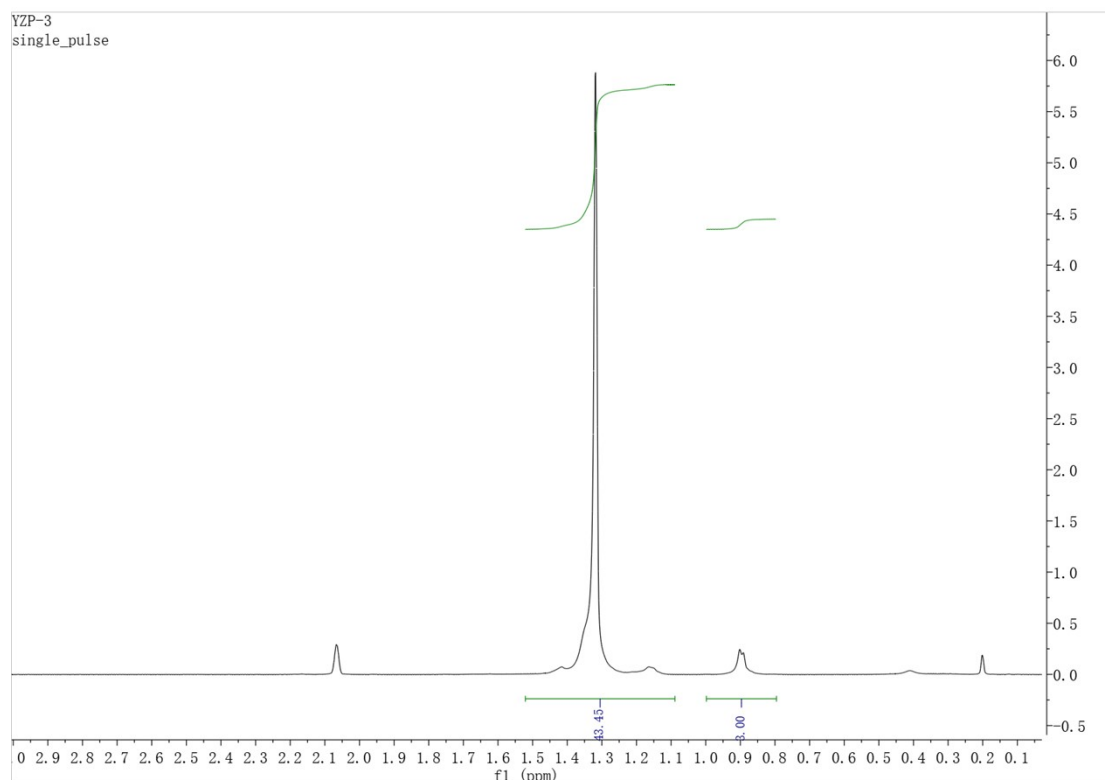

**Figure S15.**  $^1\text{H}$  NMR spectrum of the polymer from table 1, entry 3 ( $d^8$ -toluene, 100  $^\circ\text{C}$ ).

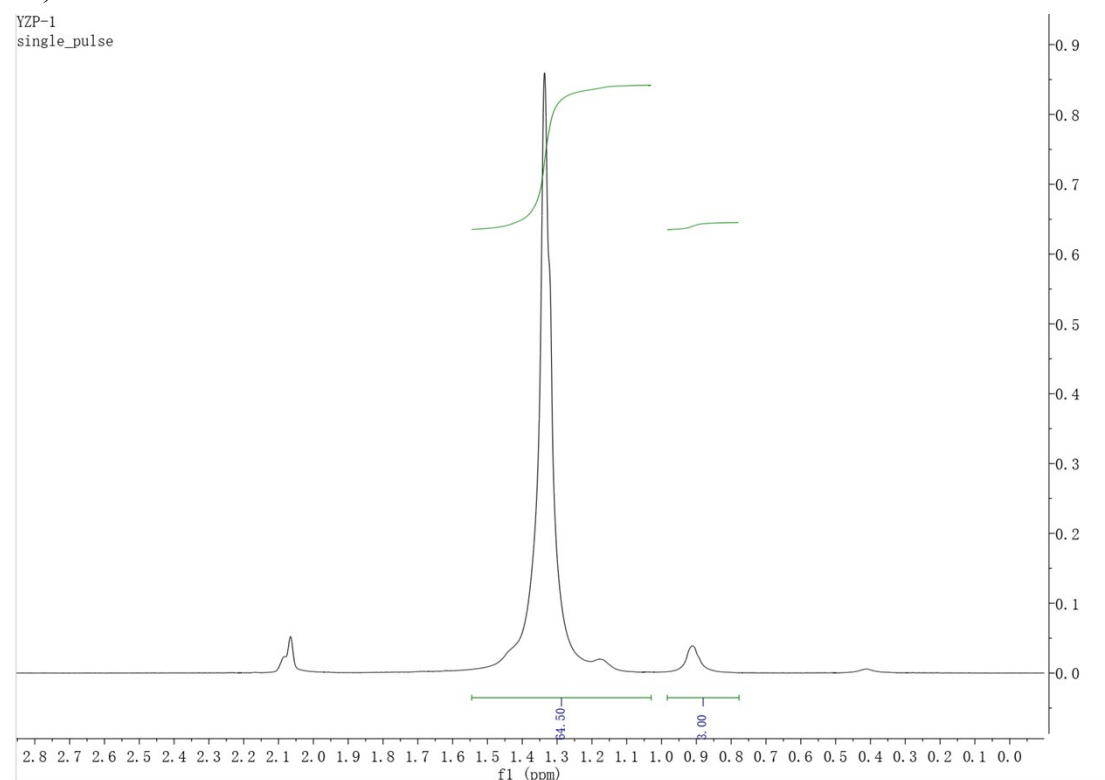

**Figure S16.**  $^1\text{H}$  NMR spectrum of the polymer from table 1, entry 4 ( $d^8$ -toluene, 100  $^\circ\text{C}$ ).



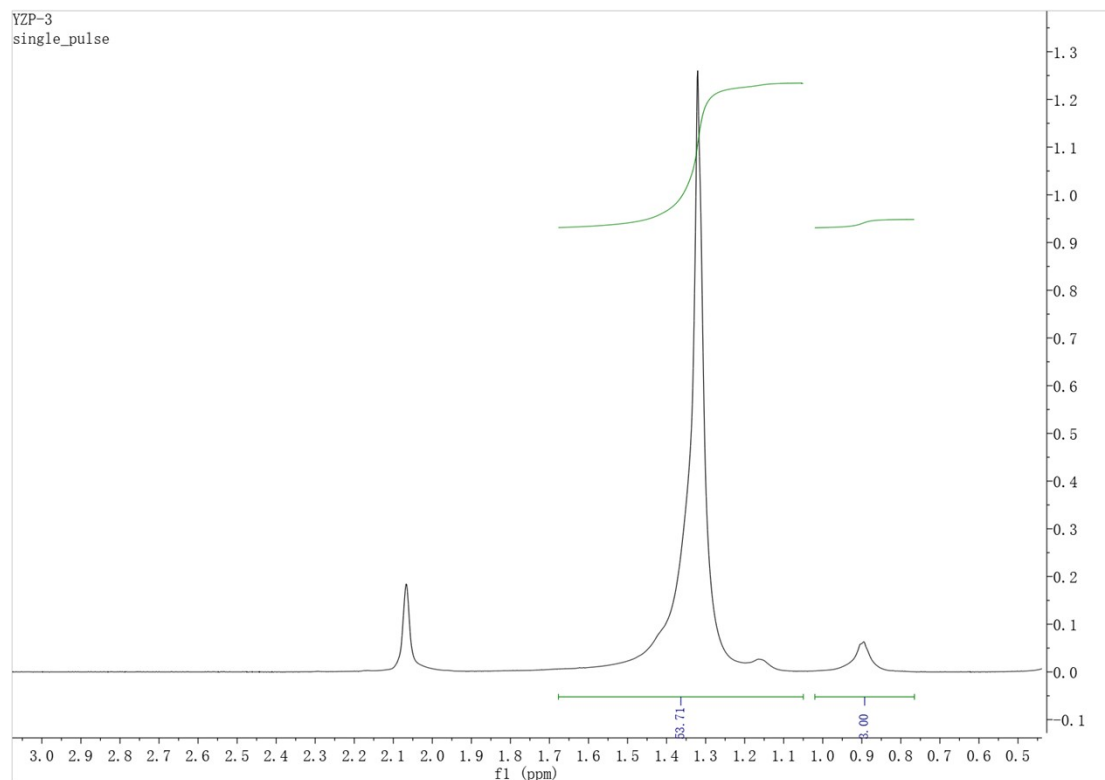

**Figure S17.**  $^1\text{H}$  NMR spectrum of the polymer from table 1, entry 6 ( $d^8$ -toluene, 100  $^\circ\text{C}$ ).

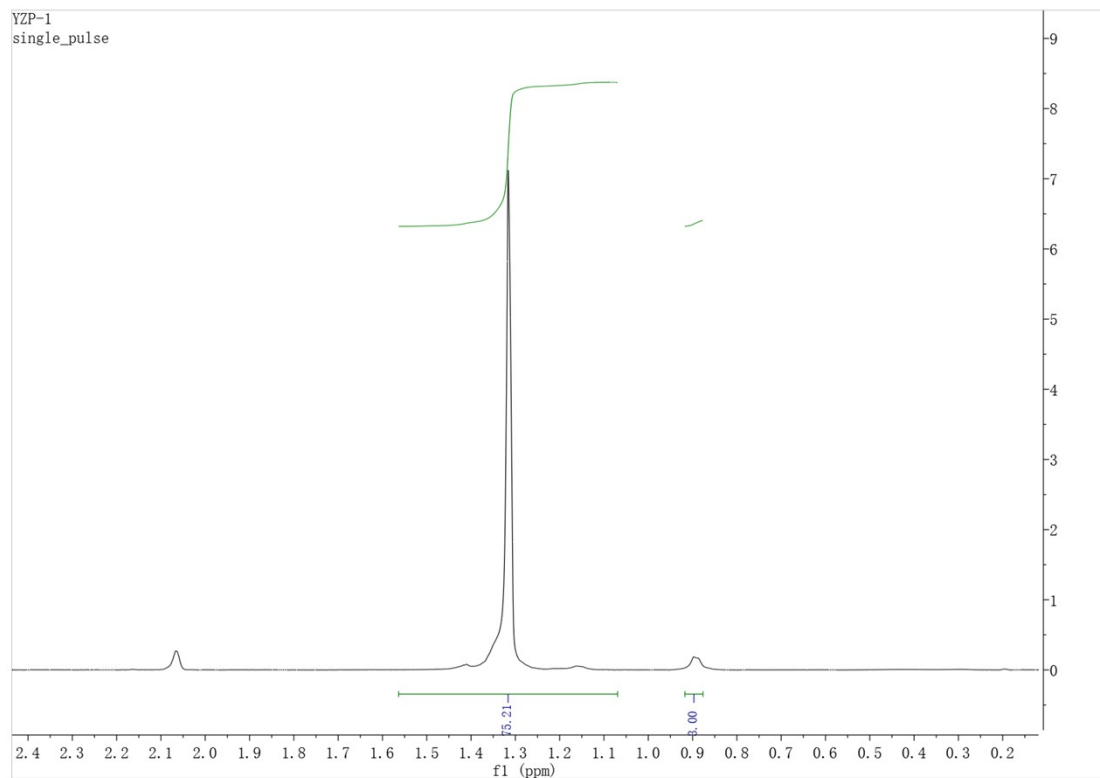

**Figure S18.**  $^1\text{H}$  NMR spectrum of the polymer from table 1, entry 7 ( $d^8$ -toluene, 100  $^\circ\text{C}$ ).

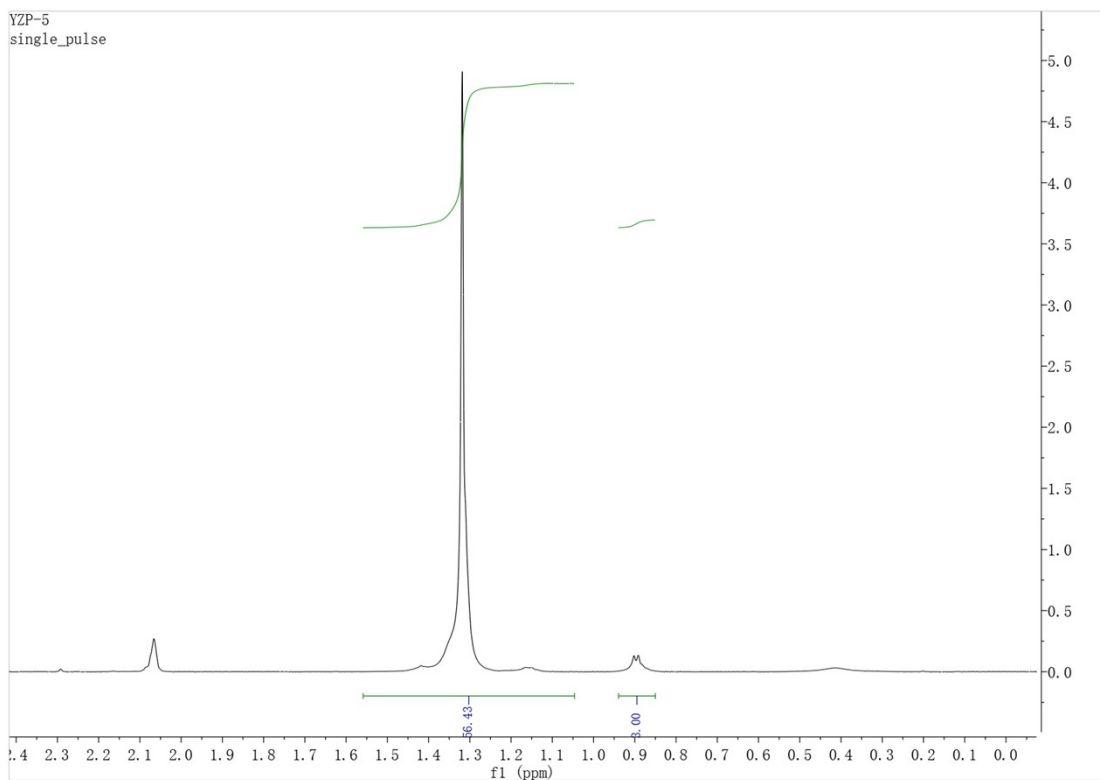

**Figure S19.**  $^1\text{H}$  NMR spectrum of the polymer from table 1, entry 11 ( $\text{d}^8$ -toluene, 100  $^\circ\text{C}$ ).

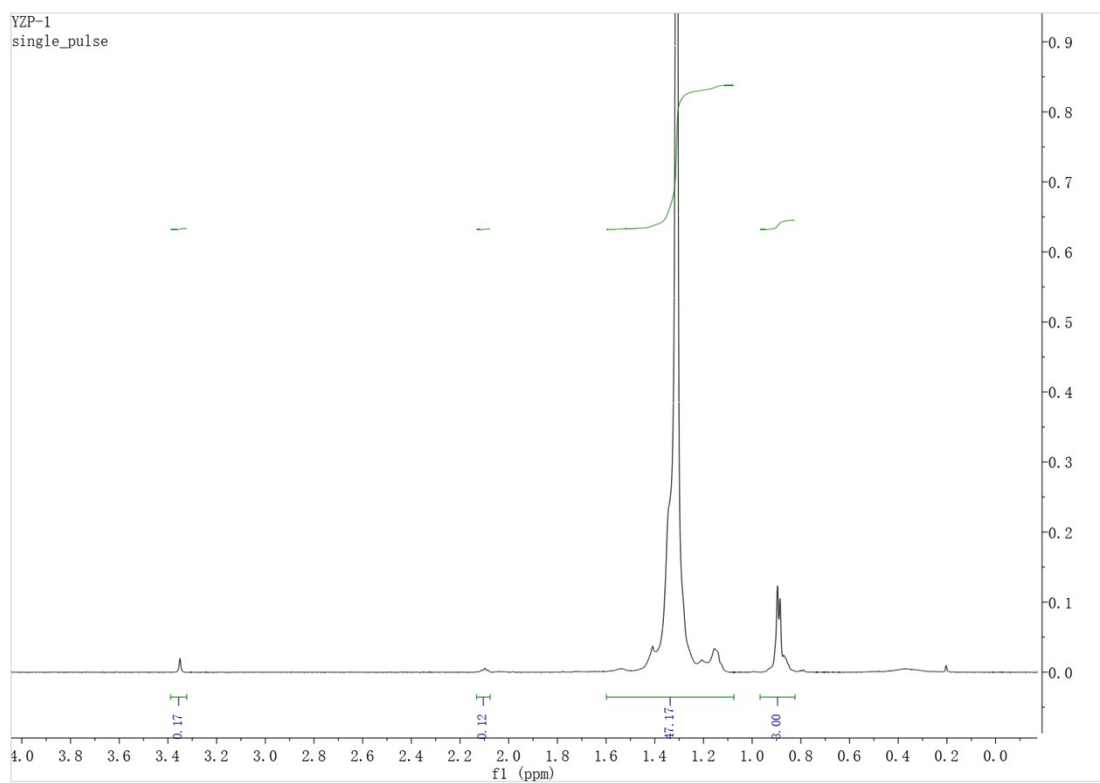

**Figure S20.**  $^1\text{H}$  NMR spectrum of the E-MU copolymer from table 2, entry 1 ( $\text{C}_6\text{D}_6$ , 75  $^\circ\text{C}$ ).

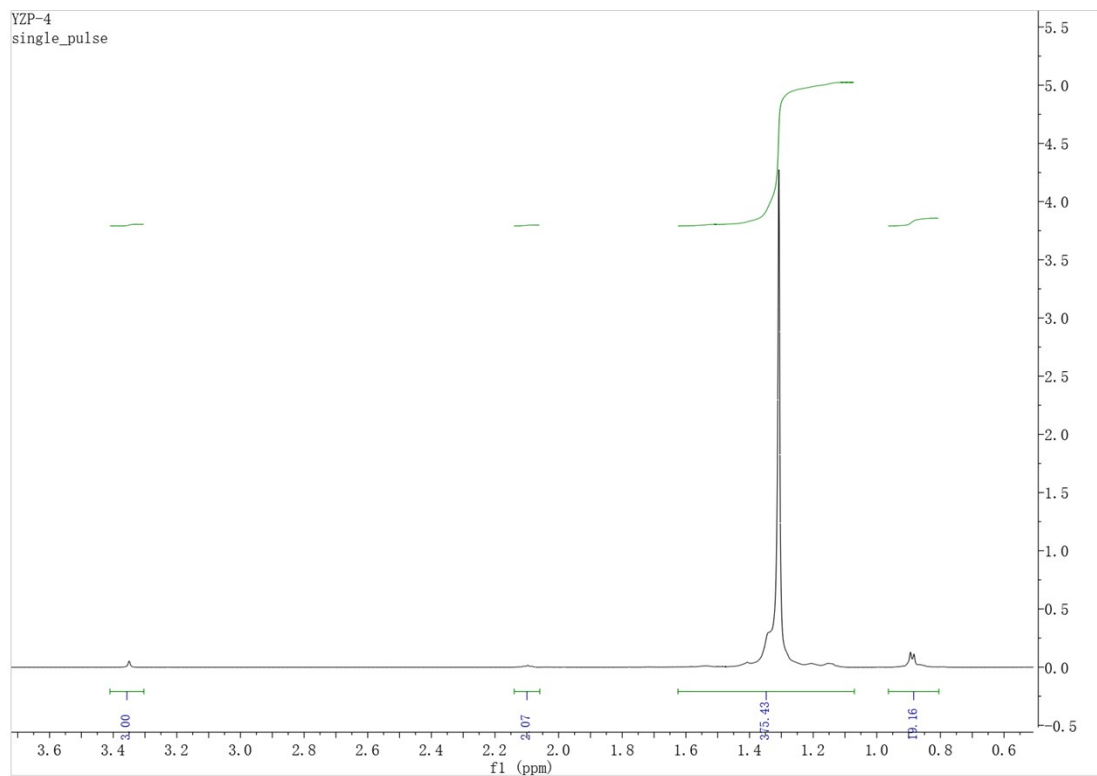

**Figure S21.**  $^1\text{H}$  NMR spectrum of the E-MU copolymer from table 2, entry 4 ( $\text{C}_6\text{D}_6$ ,  $75\text{ }^\circ\text{C}$ ).

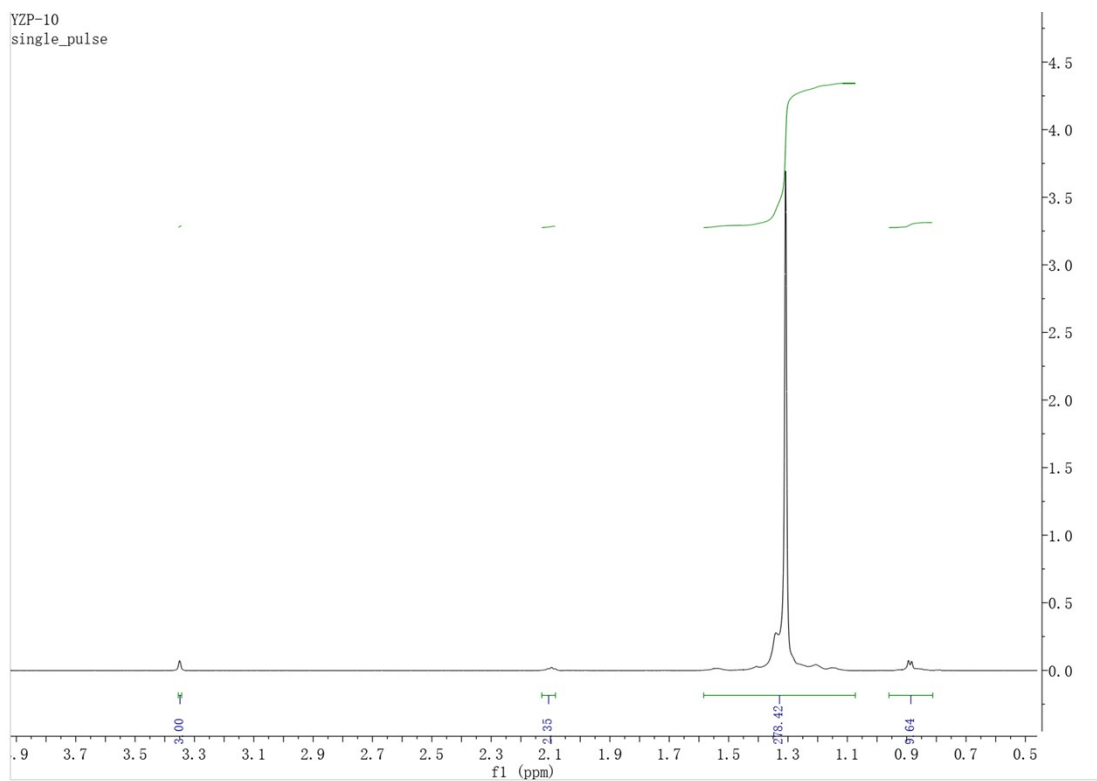

**Figure S22.**  $^1\text{H}$  NMR spectrum of the E-MU copolymer from table 2, entry 10 ( $\text{C}_6\text{D}_6$ ,  $75\text{ }^\circ\text{C}$ ).

## 2.4 DSC and GPC of Representative Polymers and Copolymers.

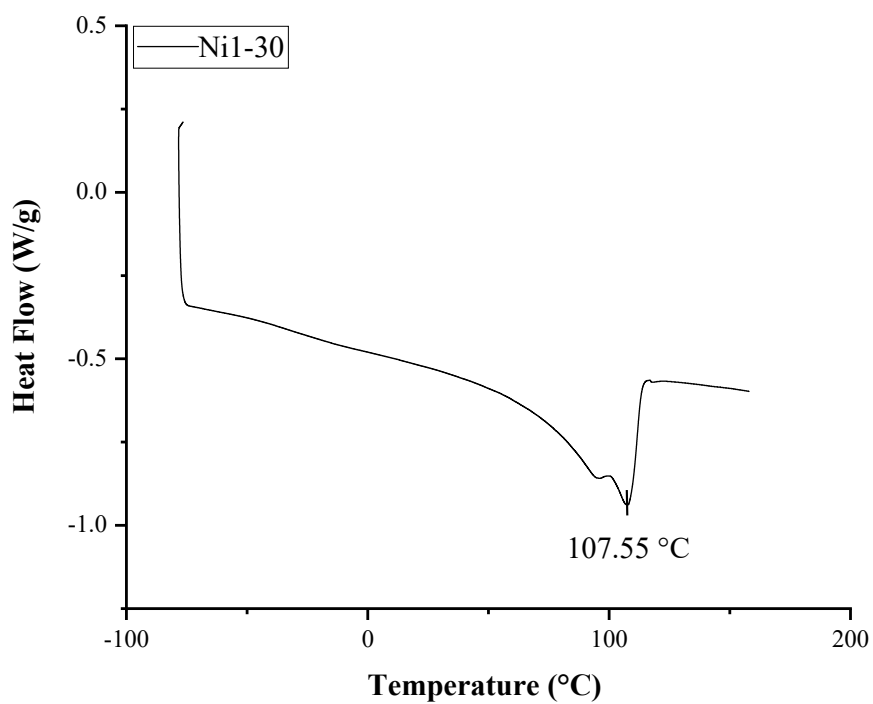

Figure S23. DSC of the polymer from table 1, entry 1.

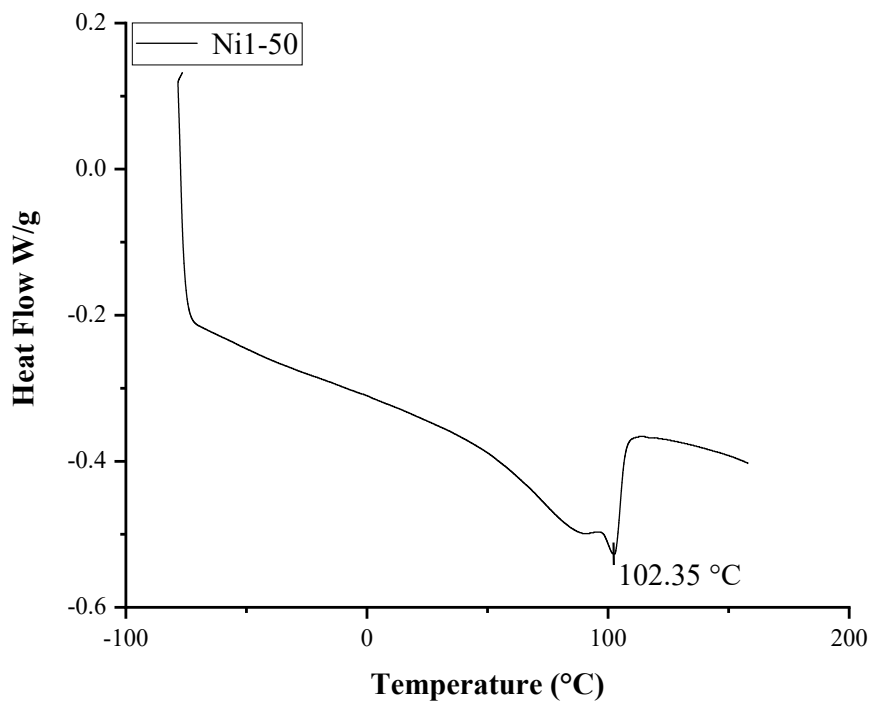

Figure S24. DSC of the polymer from table 1, entry 2.

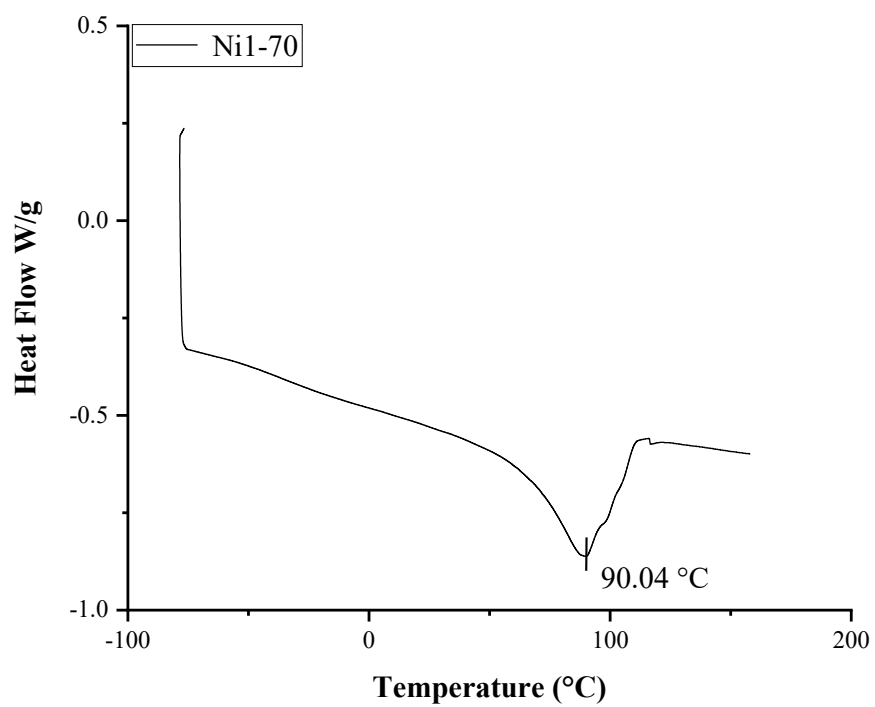

Figure S25. DSC of the polymer from table 1, entry 3.

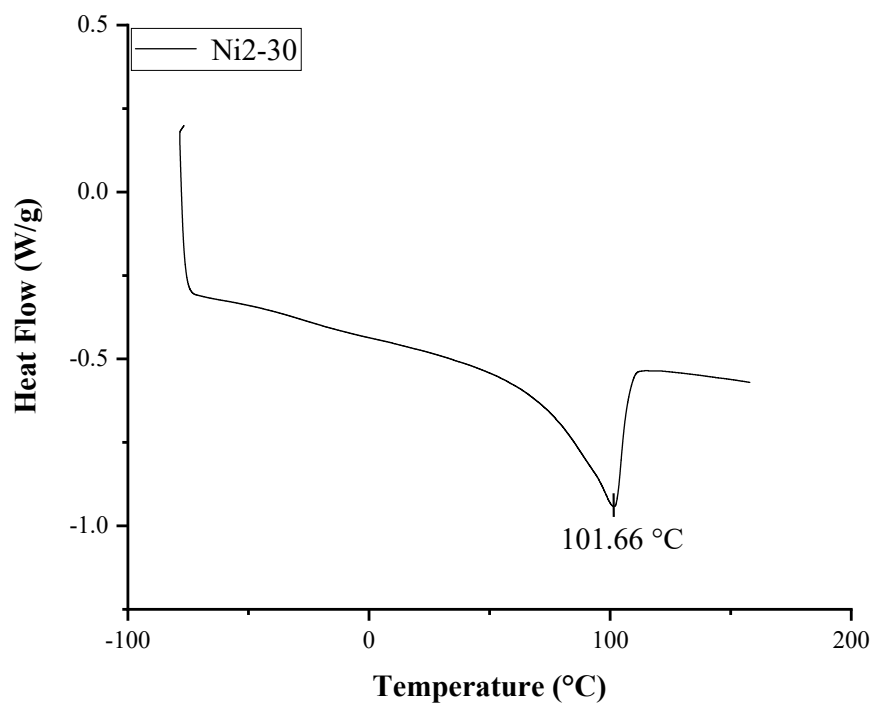

Figure S26. DSC of the polymer from table 1, entry 4.

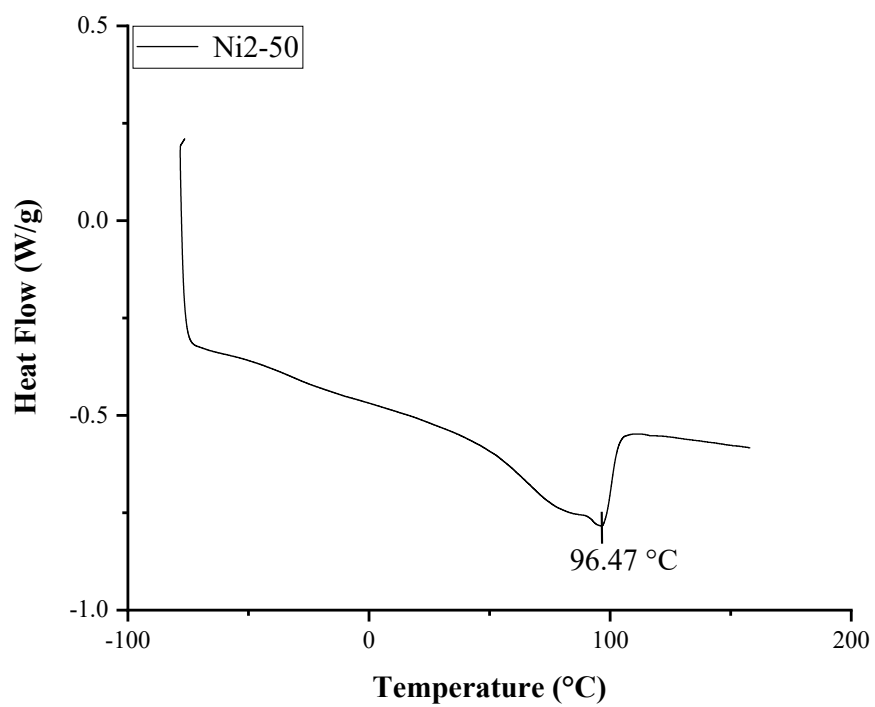

Figure S27. DSC of the polymer from table 1, entry 5.

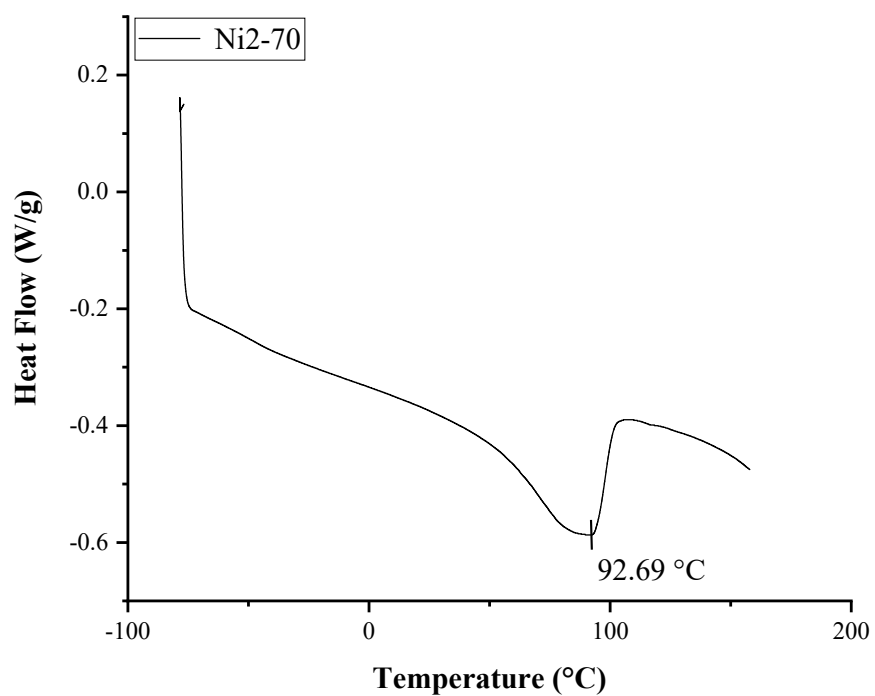

Figure S28. DSC of the polymer from table 1, entry 6.

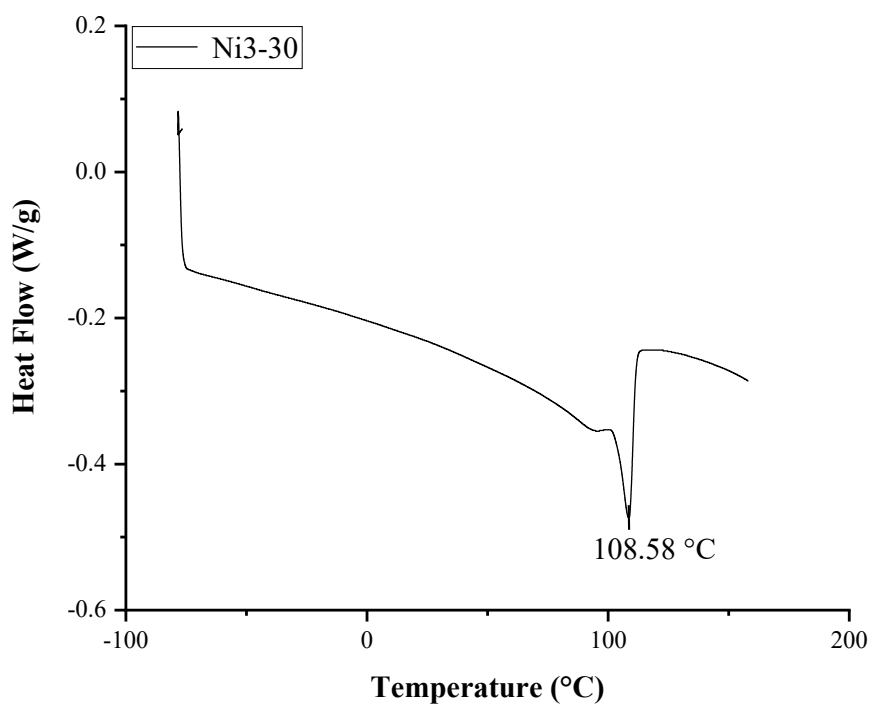

Figure S29. DSC of the polymer from table 1, entry 7.

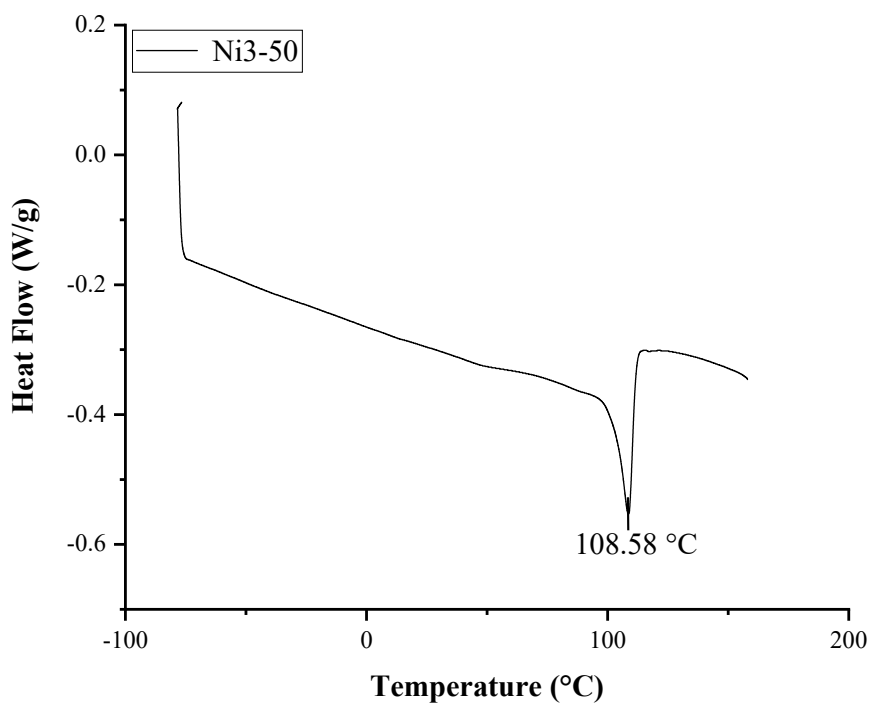

Figure S30. DSC of the polymer from table 1, entry 8.

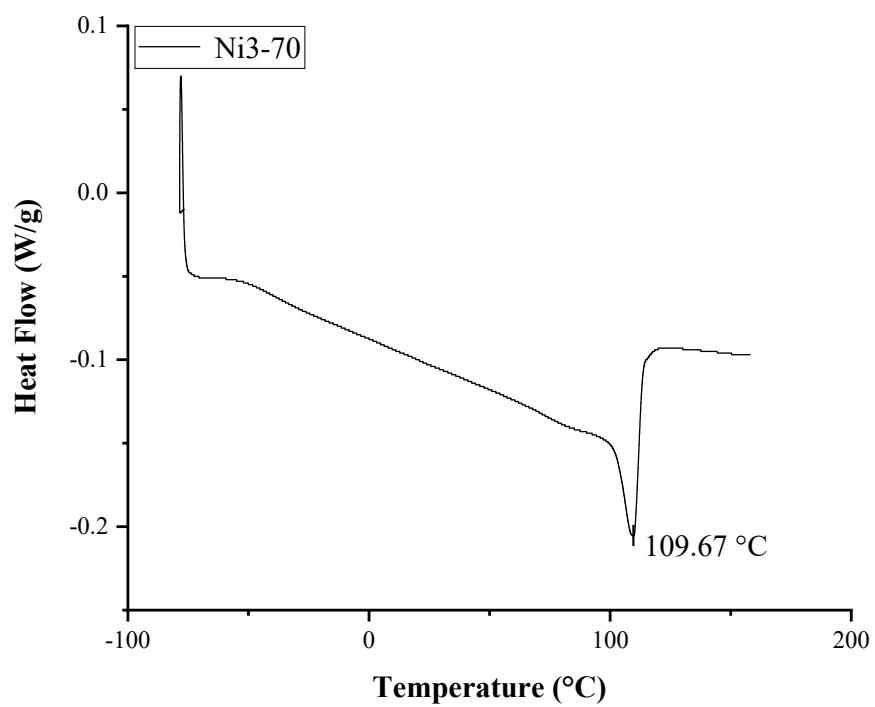

Figure S31. DSC of the polymer from table 1, entry 9.

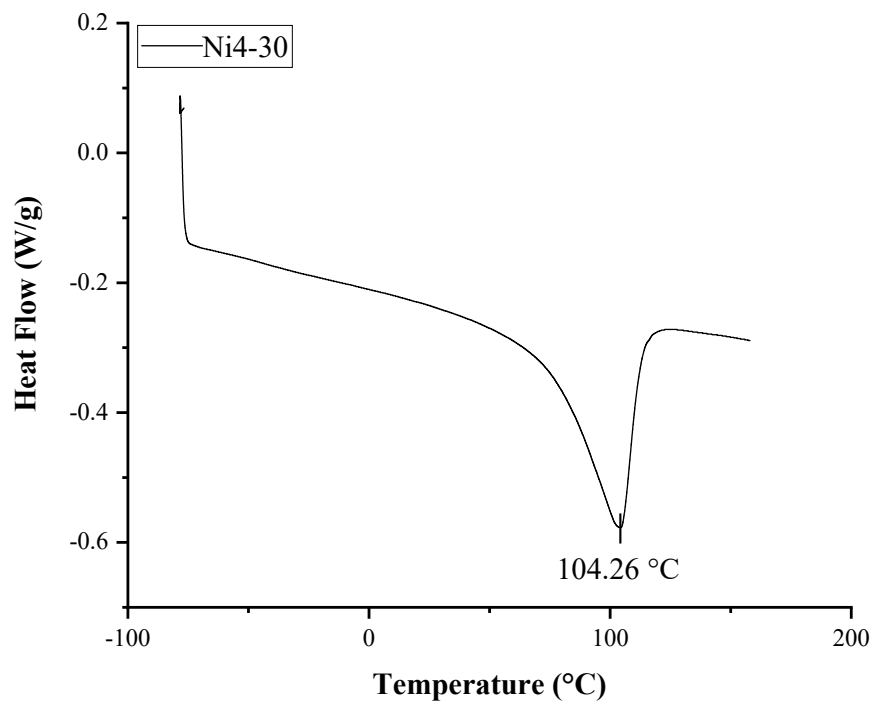

Figure S32. DSC of the polymer from table 1, entry 10.



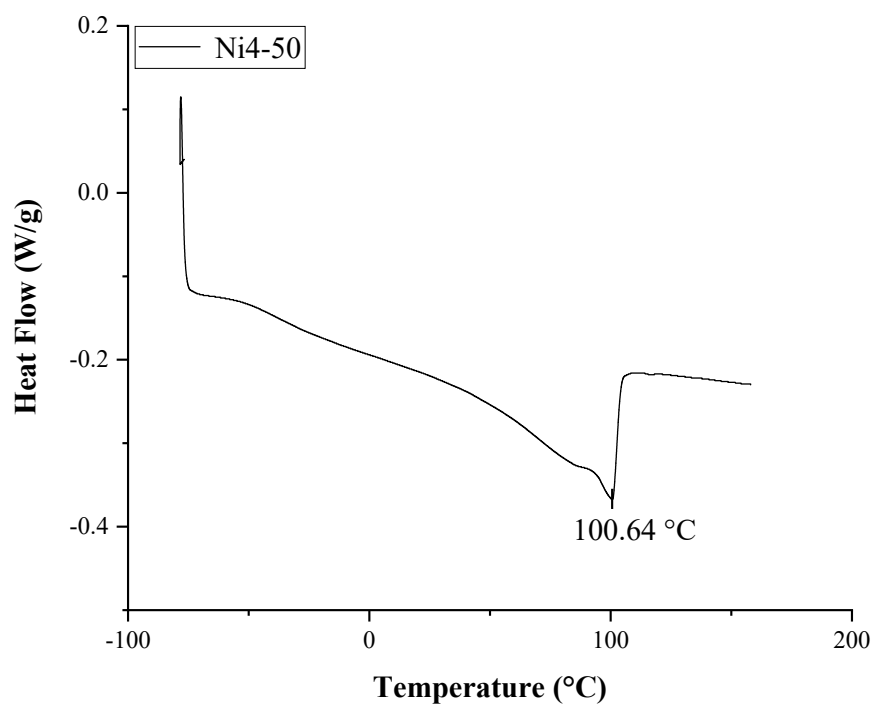

Figure S33. DSC of the polymer from table 1, entry 11.

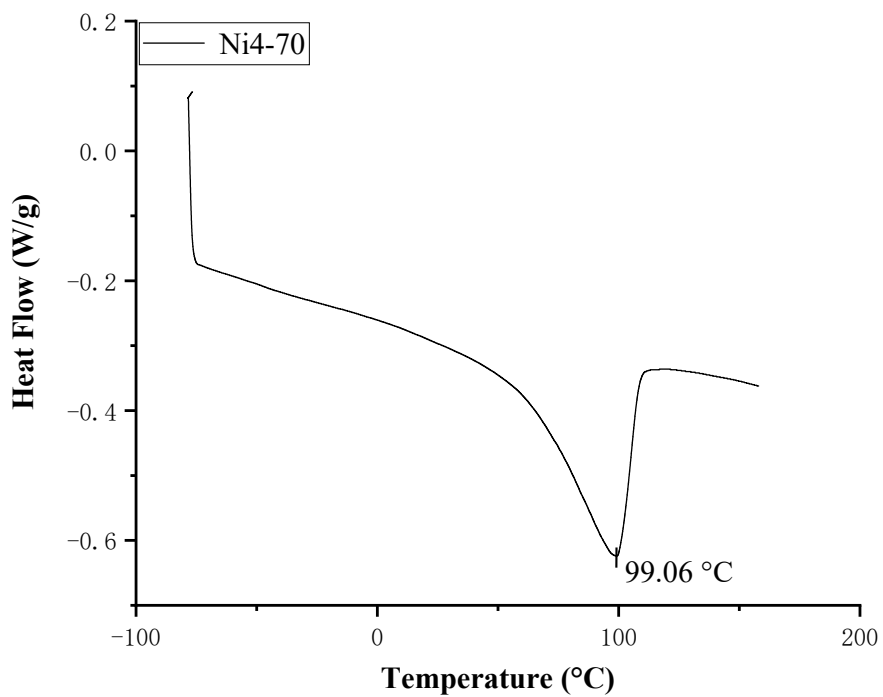

Figure S34. DSC of the polymer from table 1, entry 12.

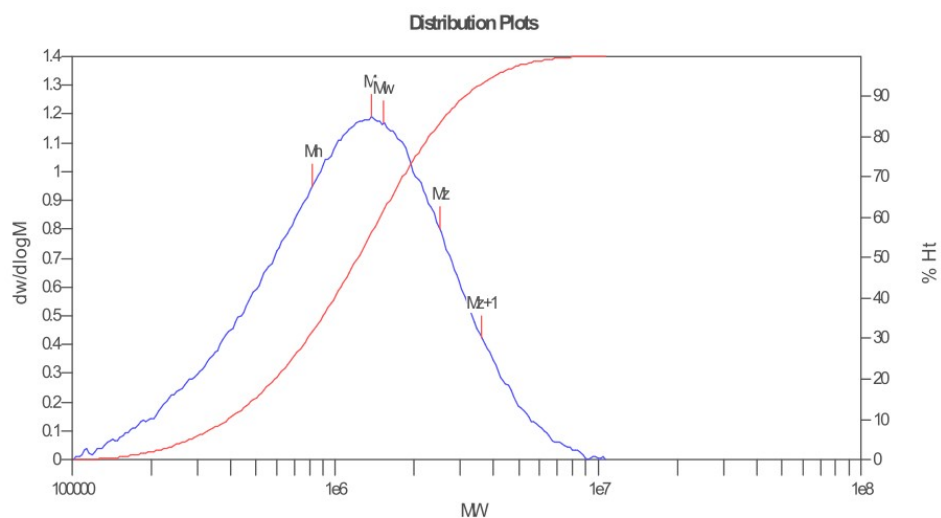

**MW Averages**

| Peak No | Mp      | Mn     | Mw      | Mz      | Mz+1    | Mv      | PD      |
|---------|---------|--------|---------|---------|---------|---------|---------|
| 1       | 1379463 | 819846 | 1526361 | 2495404 | 3616847 | 1405547 | 1.86177 |

**Figure S35.** GPC of the polymer from table 1, entry 1.

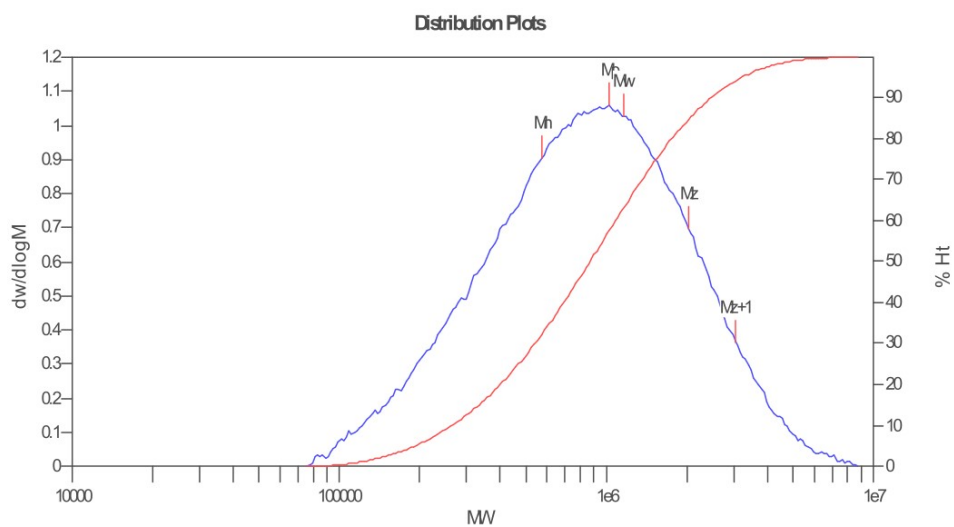

**MW Averages**

| Peak No | Mp      | Mn     | Mw      | Mz      | Mz+1    | Mv      | PD     |
|---------|---------|--------|---------|---------|---------|---------|--------|
| 1       | 1029535 | 575296 | 1156114 | 2027892 | 3039748 | 1051098 | 2.0096 |

**Figure S36.** GPC of the polymer from table 1, entry 2.

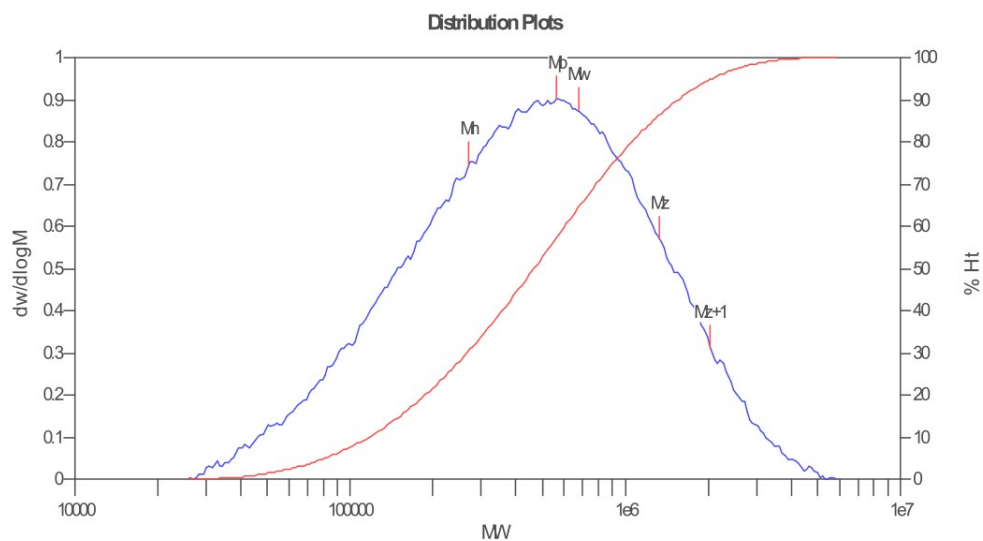

**MW Averages**

| Peak No | Mp     | Mn     | Mw     | Mz      | Mz+1    | Mv     | PD      |
|---------|--------|--------|--------|---------|---------|--------|---------|
| 1       | 560698 | 269254 | 678109 | 1332790 | 2038238 | 600961 | 2.51847 |

**Figure S37.** GPC of the polymer from table 1, entry 3.

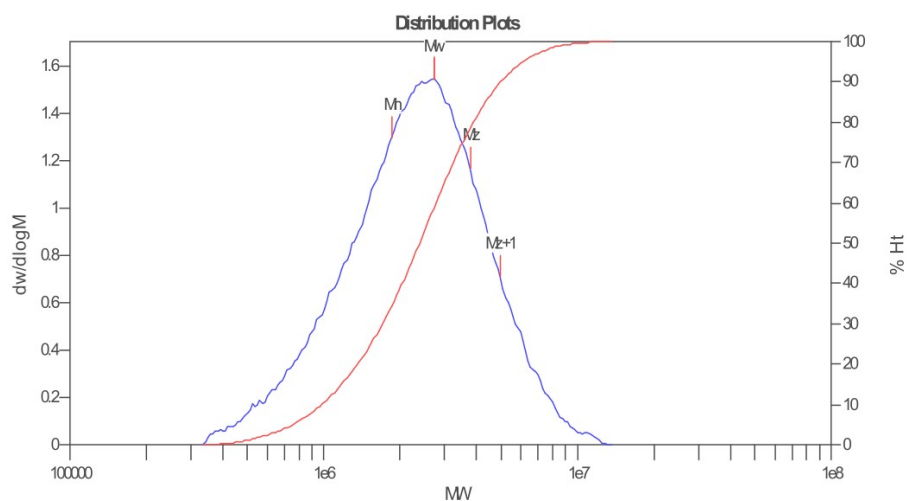

**MW Averages**

| Peak No | Mp      | Mn      | Mw      | Mz      | Mz+1    | Mv      | PD      |
|---------|---------|---------|---------|---------|---------|---------|---------|
| 1       | 2709854 | 1845960 | 2722676 | 3774762 | 4943548 | 2582084 | 1.47494 |

**Figure S38.** GPC of the polymer from table 1, entry 4.

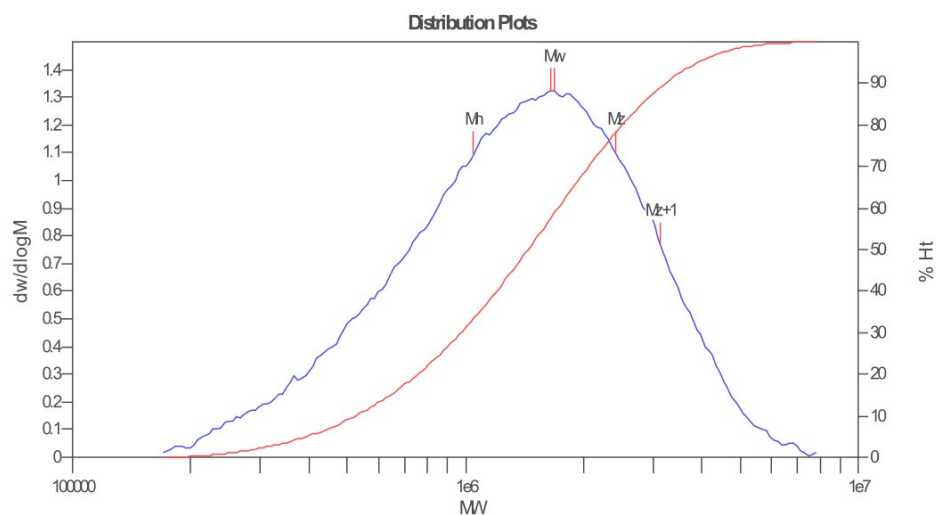

**MW Averages**

| Peak No | Mp      | Mn      | Mw      | Mz      | Mz+1    | Mv      | PD      |
|---------|---------|---------|---------|---------|---------|---------|---------|
| 1       | 1651605 | 1047775 | 1680566 | 2409726 | 3136467 | 1580279 | 1.60394 |

**Figure S39.** GPC of the polymer from table 1, entry 5.

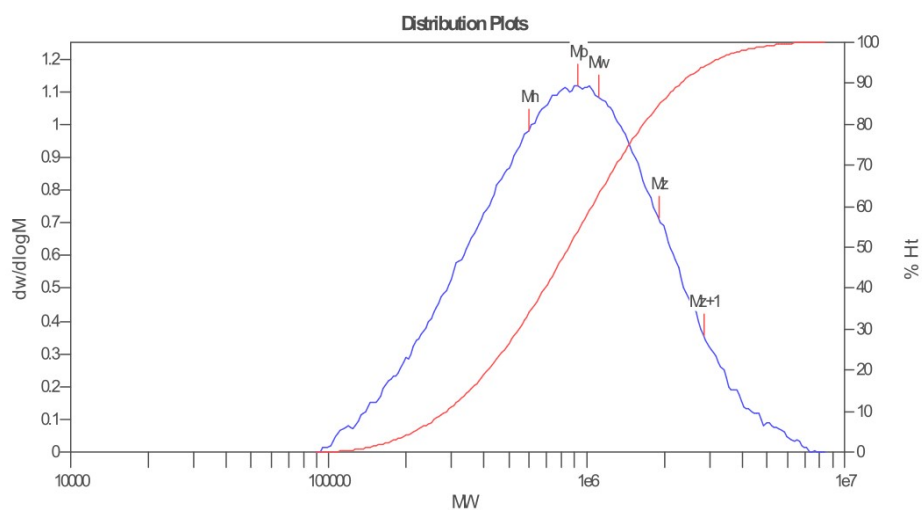

**MW Averages**

| Peak No | Mp     | Mn     | Mw      | Mz      | Mz+1    | Mv      | PD      |
|---------|--------|--------|---------|---------|---------|---------|---------|
| 1       | 919959 | 600176 | 1115148 | 1904897 | 2848204 | 1021017 | 1.85803 |

**Figure S40.** GPC of the polymer from table 1, entry 6.

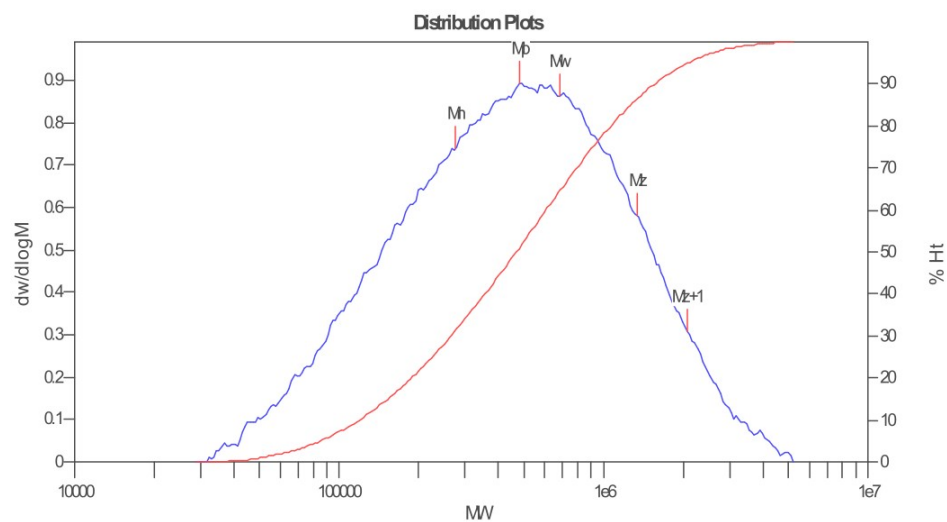

#### MW Averages

| Peak No | Mp     | Mn     | Mw     | Mz      | Mz+1    | Mv     | PD      |
|---------|--------|--------|--------|---------|---------|--------|---------|
| 1       | 478969 | 276355 | 682439 | 1347853 | 2070969 | 604628 | 2.46943 |

**Figure S41.** GPC of the polymer from table 1, entry 7.

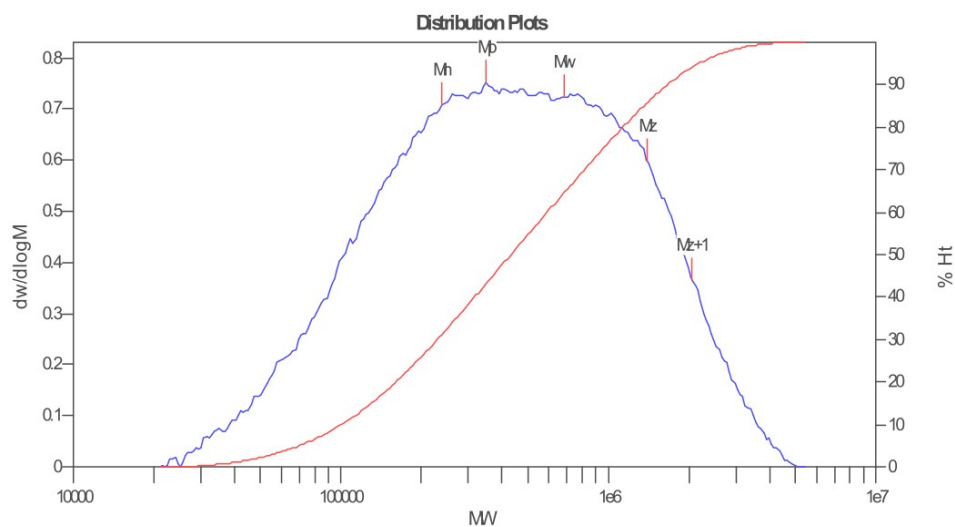

#### MW Averages

| Peak No | Mp     | Mn     | Mw     | Mz      | Mz+1    | Mv     | PD      |
|---------|--------|--------|--------|---------|---------|--------|---------|
| 1       | 349513 | 237795 | 684366 | 1399550 | 2051726 | 597285 | 2.87797 |

**Figure S42.** GPC of the polymer from table 1, entry 8.

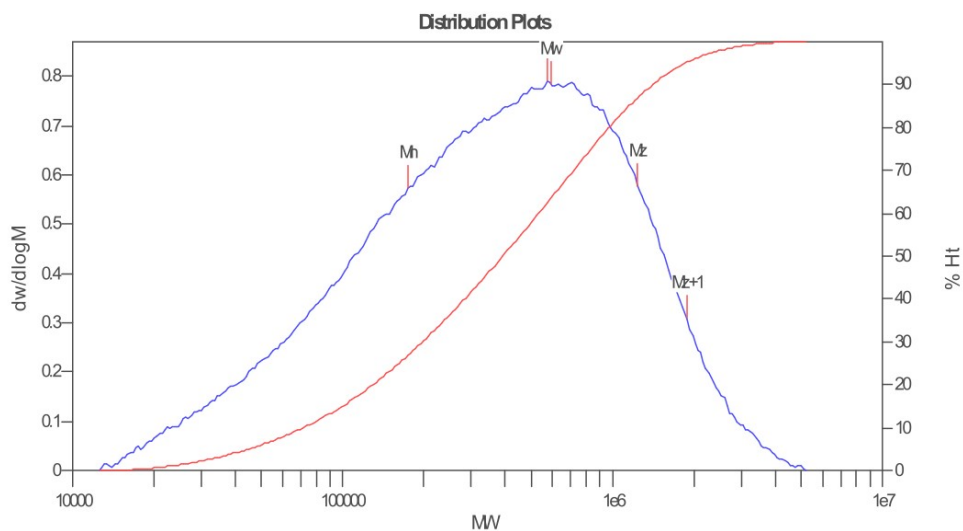

**MW Averages**

| Peak No | Mp     | Mn     | Mw     | Mz      | Mz+1    | Mv     | PD      |
|---------|--------|--------|--------|---------|---------|--------|---------|
| 1       | 573460 | 174688 | 594602 | 1239810 | 1885677 | 516393 | 3.40379 |

**Figure S43.** GPC of the polymer from table 1, entry 9.

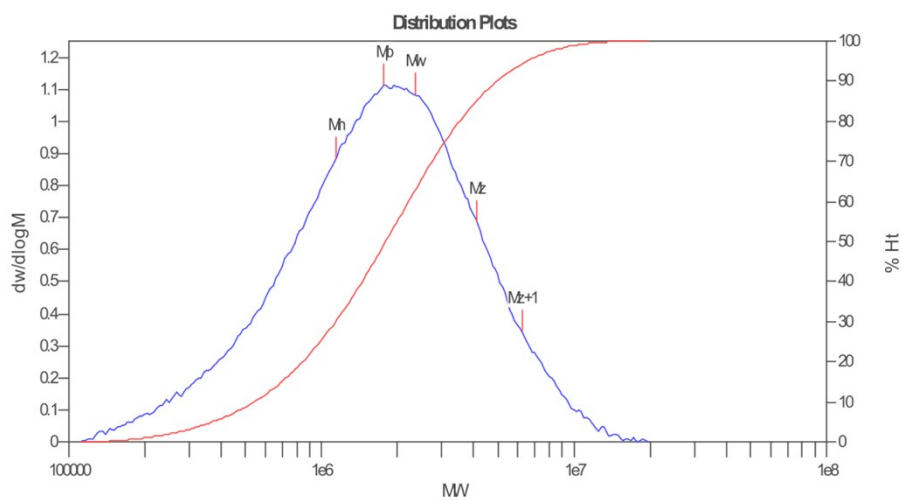

**MW Averages**

| Peak No | Mp      | Mn      | Mw      | Mz      | Mz+1    | Mv      | PD      |
|---------|---------|---------|---------|---------|---------|---------|---------|
| 1       | 1766973 | 1142570 | 2353479 | 4111595 | 6211115 | 2142044 | 2.05981 |

**Figure S44.** GPC of the polymer from table 1, entry 10.

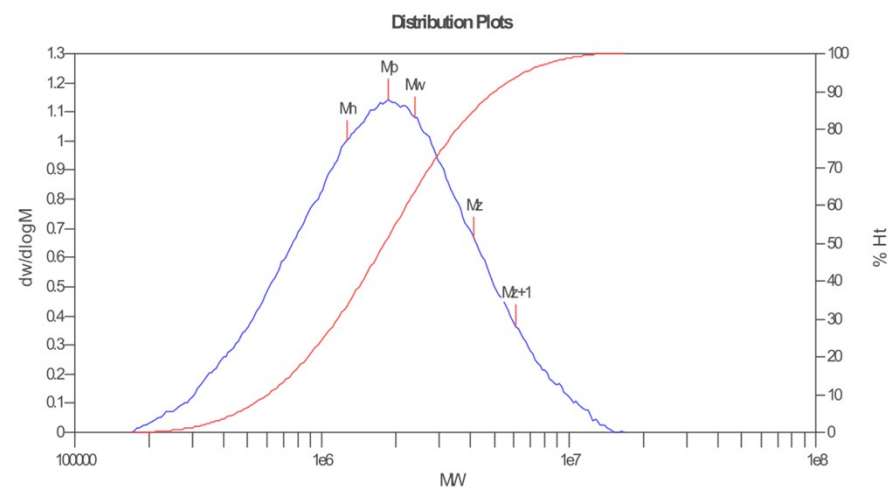

**MW Averages**

| Peak No | Mp      | Mn      | Mw      | Mz      | Mz+1    | Mv      | PD      |
|---------|---------|---------|---------|---------|---------|---------|---------|
| 1       | 1848327 | 1260029 | 2379224 | 4098218 | 6083779 | 2174214 | 1.88823 |

**Figure S45.** GPC of the polymer from table 1, entry 11.

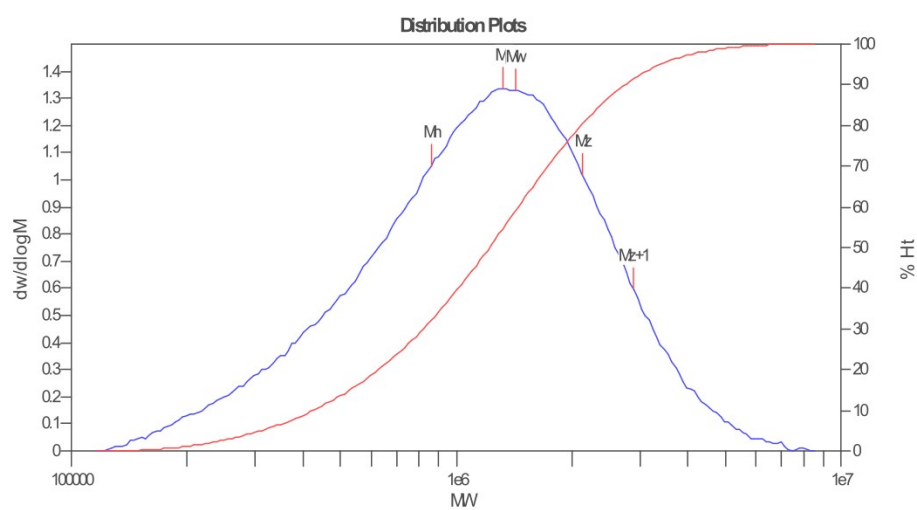

**MW Averages**

| Peak No | Mp      | Mn     | Mw      | Mz      | Mz+1    | Mv      | PD      |
|---------|---------|--------|---------|---------|---------|---------|---------|
| 1       | 1318746 | 861315 | 1431836 | 2124284 | 2887235 | 1340148 | 1.66238 |

**Figure S46.** GPC of the polymer from table 1, entry 12.

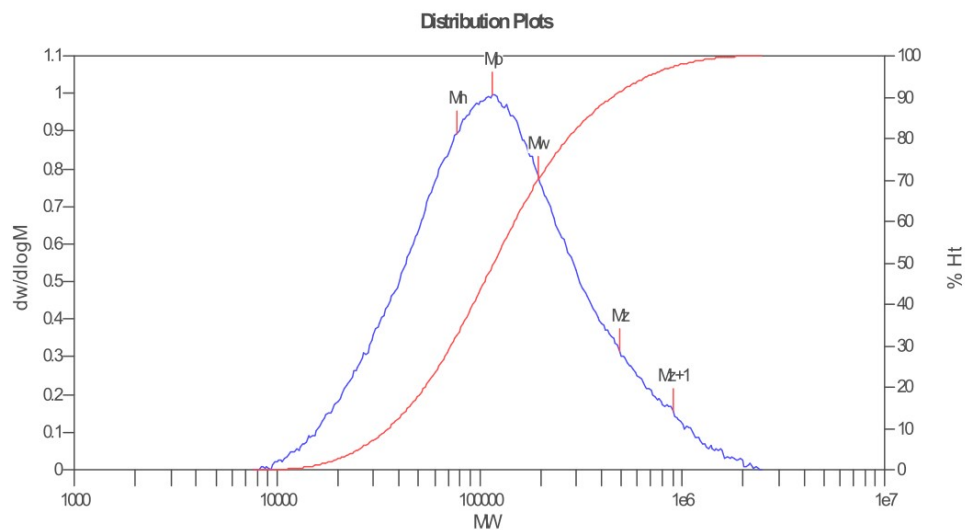

**MW Averages**

| Peak No | Mp     | Mn    | Mw     | Mz     | Mz+1   | Mv     | PD      |
|---------|--------|-------|--------|--------|--------|--------|---------|
| 1       | 116014 | 77826 | 196483 | 490664 | 901680 | 169456 | 2.52464 |

**Figure S47.** GPC of the polymer from table 2, entry 1.

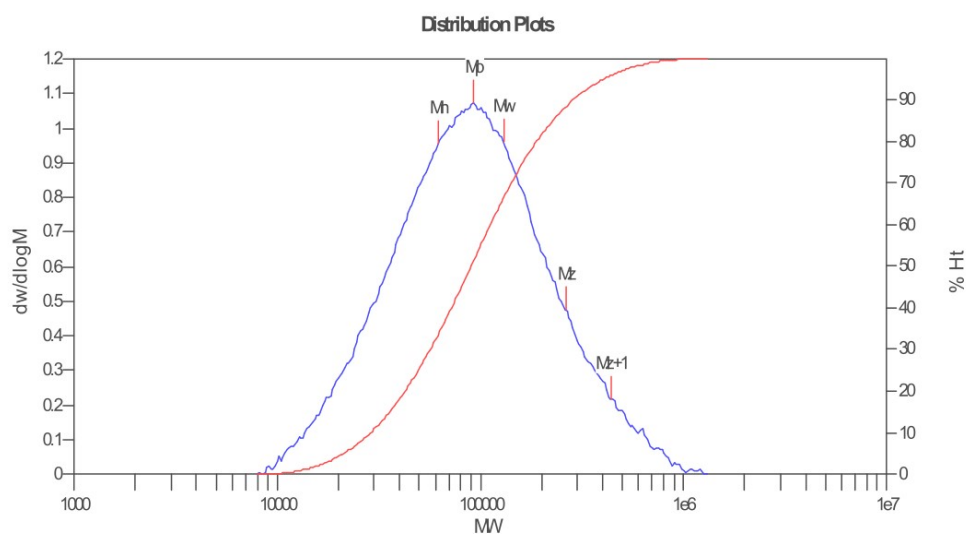

**MW Averages**

| Peak No | Mp    | Mn    | Mw     | Mz     | Mz+1   | Mv     | PD      |
|---------|-------|-------|--------|--------|--------|--------|---------|
| 1       | 92633 | 62008 | 130653 | 263216 | 439993 | 116701 | 2.10703 |

**Figure S48.** GPC of the polymer from table 2, entry 2.



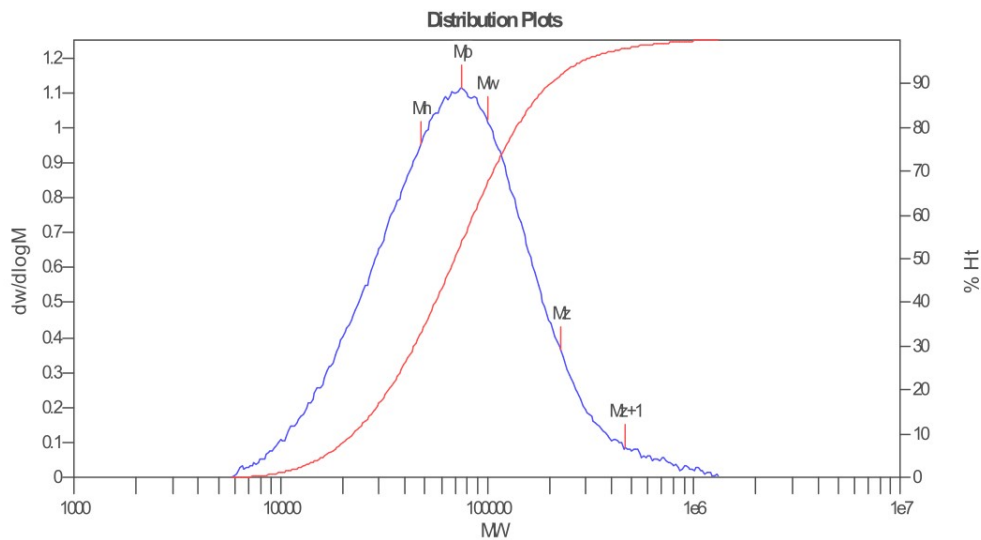

**MW Averages**

| Peak No | Mp    | Mn    | Mw     | Mz     | Mz+1   | Mv    | PD      |
|---------|-------|-------|--------|--------|--------|-------|---------|
| 1       | 75647 | 47561 | 100215 | 226762 | 465649 | 89009 | 2.10708 |

**Figure S49.** GPC of the polymer from table 2, entry 3.

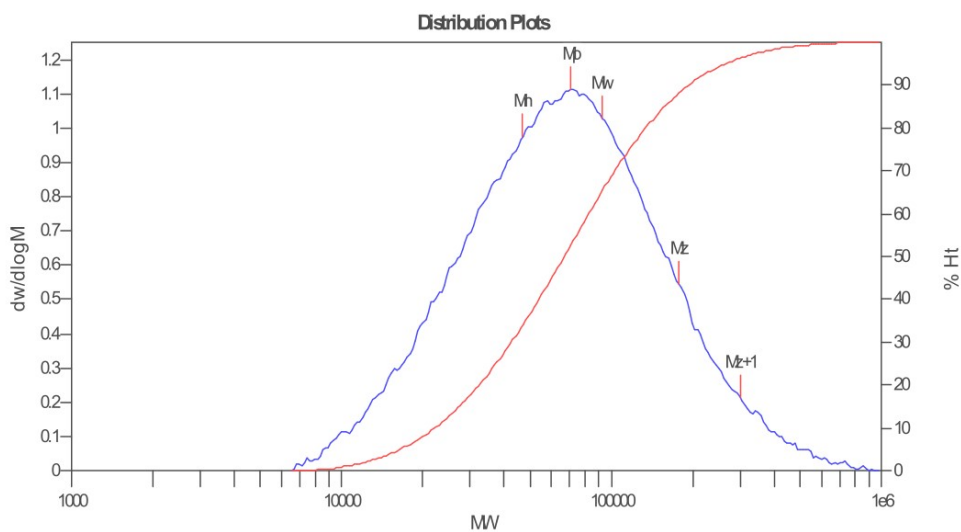

**MW Averages**

| Peak No | Mp    | Mn    | Mw    | Mz     | Mz+1   | Mv    | PD      |
|---------|-------|-------|-------|--------|--------|-------|---------|
| 1       | 70708 | 46751 | 92446 | 177431 | 300260 | 83435 | 1.97741 |

**Figure S50.** GPC of the polymer from table 2, entry 4.

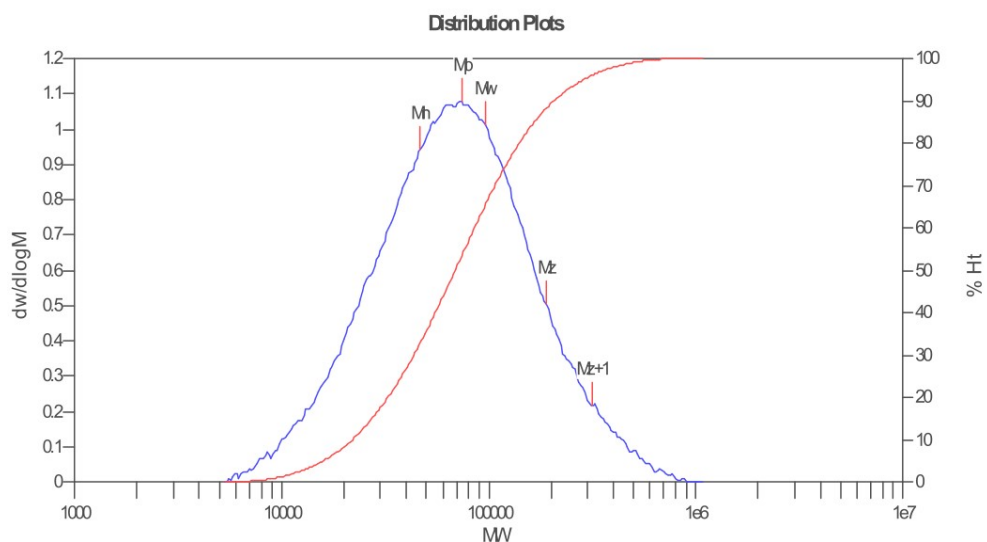

**MW Averages**

| Peak No | Mp    | Mn    | Mw    | Mz     | Mz+1   | Mv    | PD      |
|---------|-------|-------|-------|--------|--------|-------|---------|
| 1       | 73964 | 46586 | 97038 | 189839 | 315860 | 87119 | 2.08299 |

**Figure S51.** GPC of the polymer from table 2, entry 5.

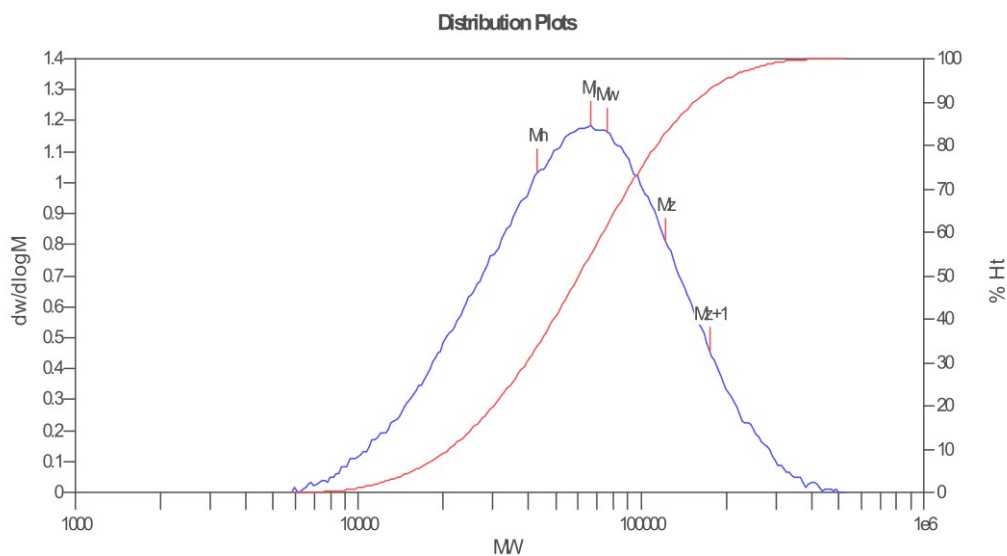

**MW Averages**

| Peak No | Mp    | Mn    | Mw    | Mz     | Mz+1   | Mv    | PD      |
|---------|-------|-------|-------|--------|--------|-------|---------|
| 1       | 66092 | 42919 | 76005 | 122403 | 175513 | 70224 | 1.77089 |

**Figure S52.** GPC of the polymer from table 2, entry 6.

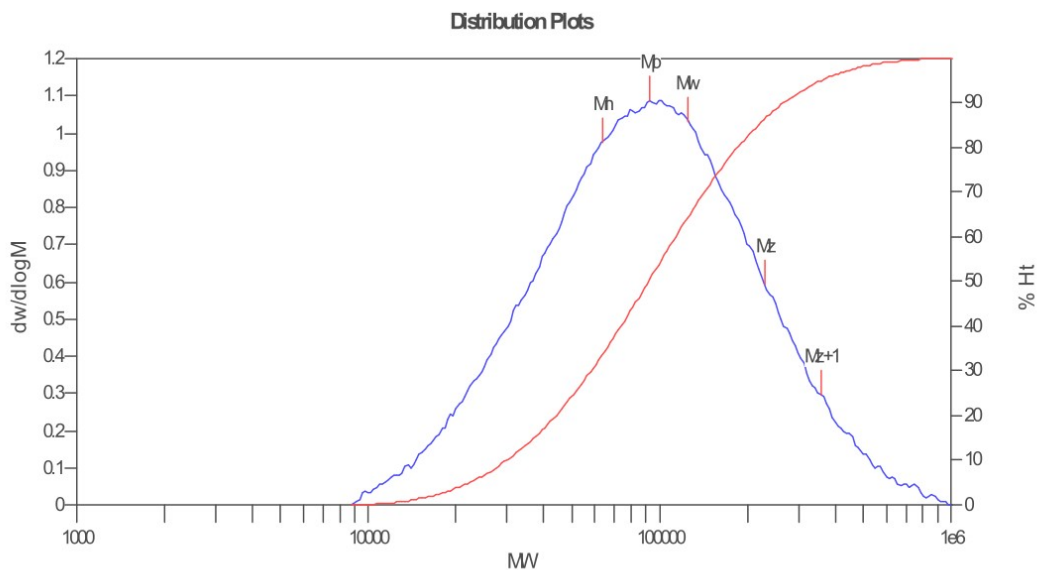

**MW Averages**

| Peak No | Mp    | Mn    | Mw     | Mz     | Mz+1   | Mv     | PD      |
|---------|-------|-------|--------|--------|--------|--------|---------|
| 1       | 92633 | 63387 | 125059 | 228684 | 359624 | 113324 | 1.97294 |

**Figure S53.** GPC of the polymer from table 2, entry 7.

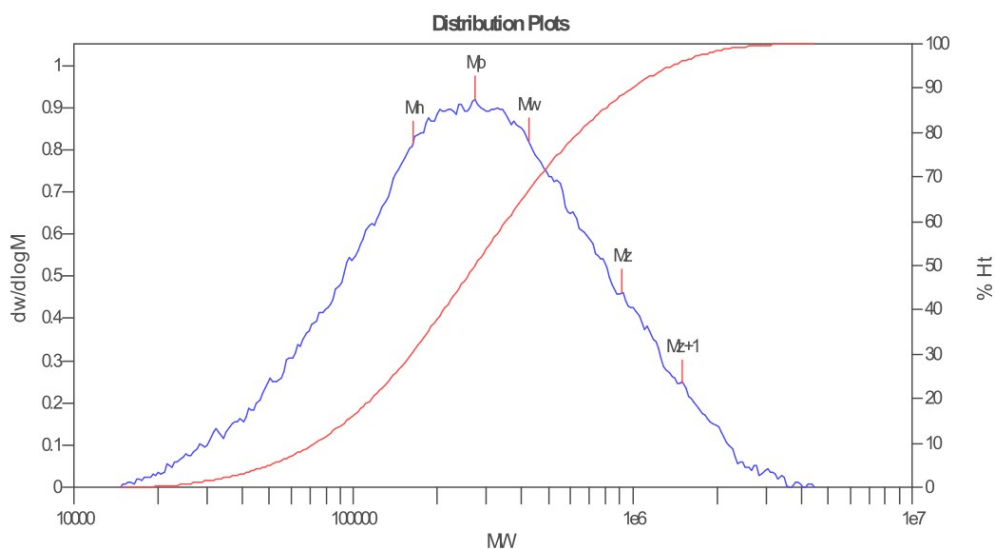

**MW Averages**

| Peak No | Mp     | Mn     | Mw     | Mz     | Mz+1    | Mv     | PD      |
|---------|--------|--------|--------|--------|---------|--------|---------|
| 1       | 272862 | 163324 | 423819 | 911827 | 1496337 | 371222 | 2.59496 |

**Figure S54.** GPC of the polymer from table 2, entry 8.

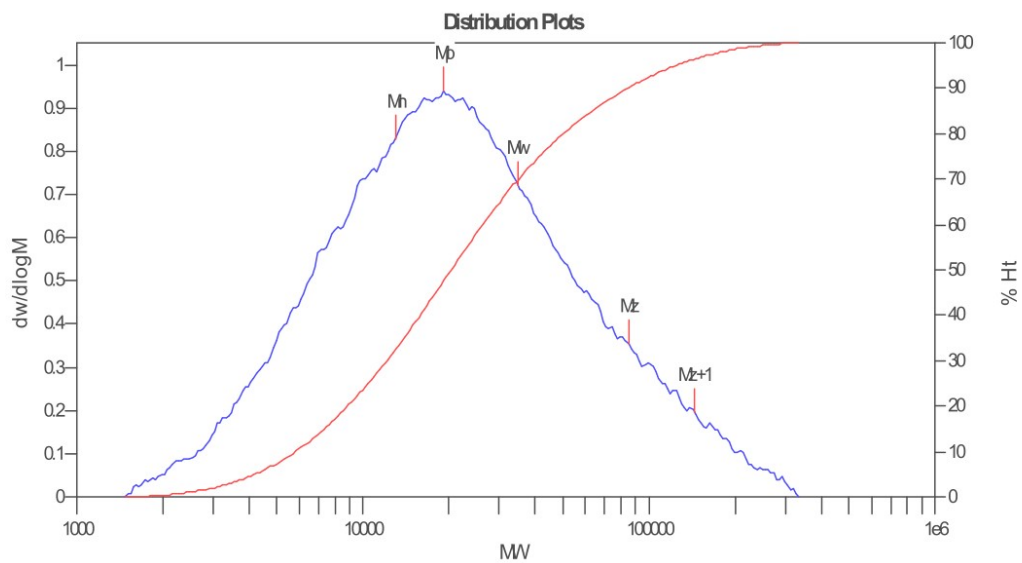

**MW Averages**

| Peak No | Mp    | Mn    | Mw    | Mz    | Mz+1   | Mv    | PD      |
|---------|-------|-------|-------|-------|--------|-------|---------|
| 1       | 19166 | 13034 | 34918 | 85079 | 144483 | 29992 | 2.67899 |

**Figure S55.** GPC of the polymer from table 2, entry 9.

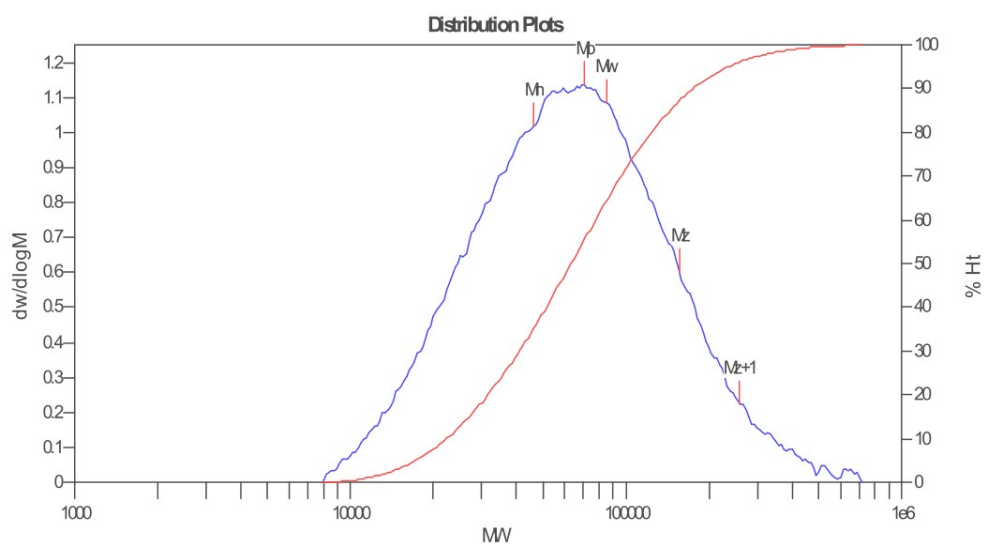

**MW Averages**

| Peak No | Mp    | Mn    | Mw    | Mz     | Mz+1   | Mv    | PD     |
|---------|-------|-------|-------|--------|--------|-------|--------|
| 1       | 70708 | 46280 | 85345 | 156148 | 258793 | 77702 | 1.8441 |

**Figure S56.** GPC of the polymer from table 2, entry 10.

## 2.5 Water Contact Angle of Polymer

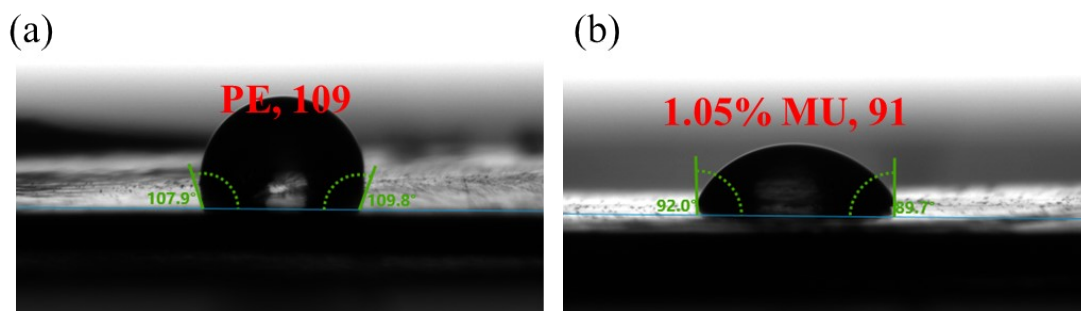

**Figure S57.** Water contact angle of the polyethylene **(a)** (sample from Table 1, entry 1) and E-MU copolymer **(b)** (sample from Table 2, entry 4)

## 3. References

1 B. Ding, G. Chang, Z. Yan and S. Dai, Ethylene (co) oligomerization using iminopyridyl Ni(II) and Pd(II) complexes bearing benzocycloalkyl moieties to access hyperbranched ethylene oligomers and ethylene-MA co-oligomers, *Front. Chem.*, 2022, **10**, 961426.

## 4. X-ray Crystallography.

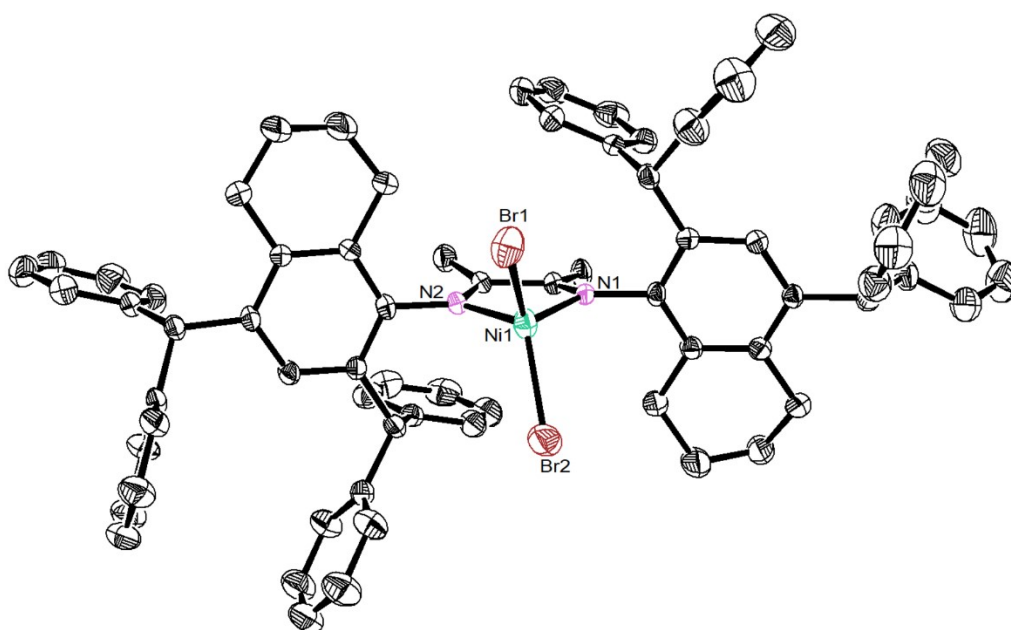

**Table S2 Crystal data and structure refinement for Ni2.**

|                     |     |
|---------------------|-----|
| Identification code | Ni2 |
|---------------------|-----|

|                                             |                                                                        |
|---------------------------------------------|------------------------------------------------------------------------|
| Empirical formula                           | C77 H70 Br2 Cl2 N2 Ni                                                  |
| Formula weight                              | 1312.78                                                                |
| Temperature/K                               | 298(2)                                                                 |
| Crystal system                              | Monoclinic                                                             |
| Space group                                 | P2(1)/c                                                                |
| a/Å                                         | 15.8351(15)                                                            |
| b/Å                                         | 23.180(2)                                                              |
| c/Å                                         | 17.8789(18)                                                            |
| $\alpha$ /°                                 | 90.00                                                                  |
| $\beta$ /°                                  | 103.973(4)                                                             |
| $\gamma$ /°                                 | 90.00                                                                  |
| Volume/Å <sup>3</sup>                       | 6368.3(11)                                                             |
| Z                                           | 4                                                                      |
| $\rho_{\text{calc}}$ /cm <sup>3</sup>       | 1.369                                                                  |
| $\mu$ /mm <sup>-1</sup>                     | 1.689                                                                  |
| F(000)                                      | 2712                                                                   |
| Crystal size/mm <sup>3</sup>                | 0.43 x 0.15 x 0.12                                                     |
| Radiation                                   | MoK $\alpha$ ( $\lambda$ = 0.71073)                                    |
| 2 $\theta$ range for data collection/°      | 2.11 to 25.02                                                          |
| Index ranges                                | -18 $\leq$ h $\leq$ 18, -27 $\leq$ k $\leq$ 14, -21 $\leq$ l $\leq$ 21 |
| Reflections collected                       | 31023                                                                  |
| Independent reflections                     | 11223 [R(int) = 0.0908]                                                |
| Data/restraints/parameters                  | 11223 / 1156 / 759                                                     |
| Goodness-of-fit on F <sup>2</sup>           | 1.067                                                                  |
| Final R indexes [I $\geq$ 2 $\sigma$ (I)]   | R1 = 0.0503, wR2 = 0.0757                                              |
| Final R indexes [all data]                  | R1 = 0.1312, wR2 = 0.0843                                              |
| Largest diff. peak/hole / e Å <sup>-3</sup> | 0.569 and -0.670                                                       |
